# Supplementary material for: First Cu-nanostar as a sustainable catalyst realized through synergistic effects of bowl-shaped features and surface activation of sporopollenin exine
Source: Royal Society of Chemistry journal article supplement (doi:10.1039/d4nr00390j), 2024-01-01
Supplement: d4nr00390j1.pdf [file d4nr00390j1.pdf]

## Electronic Supporting Information for

### **First Cu-Nanostar as Sustainable Catalyst Realized through Synergistic Effects of Bowl-shaped Features and Surface Activation of Sporopollenin Exine**

Vijayendran Gowri,<sup>a,b,†</sup> Sarita Kumari,<sup>a,†</sup> Raina Sharma,<sup>a</sup> Abdul Selim,<sup>a</sup> Govindasamy Jayamurugan<sup>a,\*</sup>

<sup>a</sup>Institute of Nano Science and Technology, Knowledge City, Sector 81, Mohali, Punjab 140306, India

<sup>b</sup>Gowriz Skincare Pvt Ltd incubated at Technology Business Incubator (TBI) at IISER Mohali, Knowledge City, Sector 81, Mohali, Punjab 140306, India

Correspondence to Govindasamy Jayamurugan (E-mail: [jayamurugan@inst.ac.in](mailto:jayamurugan@inst.ac.in); [jayamuruganinst@gmail.com](mailto:jayamuruganinst@gmail.com))

## Table of Contents

| <b>Section</b>   |                                                                               | <b>Page</b> |
|------------------|-------------------------------------------------------------------------------|-------------|
| <b>Section A</b> | General Information and Instrumentation                                       | S3          |
| <b>Section B</b> | Synthetic procedure for catalyst ESP-PEI-Cu <sup>I/II</sup> O-NS              | S4          |
| <b>Section C</b> | Characterization of fresh and reused catalyst ESP-PEI-Cu <sup>I/II</sup> O-NS | S5          |
| <b>Section D</b> |                                                                               |             |
| i)               | Precursors synthesis                                                          | S8          |
| ii)              | General procedure for ESP-PEI-Cu <sup>I/II</sup> O-NS CuAAC reaction          | S9          |
| iii)             | Spectral details of triazole products                                         | S10         |
| <b>Section E</b> | References                                                                    | S30         |

## Section A: (i) General Information

Lycopodium powder (Microtroniks Quali-tech Chem) was purchased from amazon (India) Pvt Ltd. The deionized water (DI-H<sub>2</sub>O) was obtained using the Merck-Millipore water purifier system. CuCl<sub>2</sub> was purchased from Loba Chemie. All the reagents were purchased commercially (Tokyo Chemical Industry (India) Pvt. Ltd. and Sigma Aldrich) including polyethyleneimine (PEI, Mw ~750,000 Daltons by LS, 50 wt% in H<sub>2</sub>O, Sigma Aldrich) and used without any further purification.

## (ii) Instrumentation

### Attenuated total reflection Fourier transform infrared (ATR-FT-IR) spectroscopy

Transmission spectra were measured using an Agilent Cary 660 spectrometer in the range of 4000–500 cm<sup>-1</sup>.

Powder X-ray diffraction (PXRD) was performed using a Bruker D-8 advanced diffractometer in the  $2\theta$  range of 30–80°.

<sup>1</sup>H- and <sup>13</sup>C-nuclear magnetic resonance (NMR) spectra were measured on a Bruker Avance-II spectrometer at 400 MHz and 100 MHz, respectively, using DMSO-*d*<sub>6</sub> or CDCl<sub>3</sub> as solvent. The chemical shift was reported in parts per million (ppm) relative to tetramethylsilane (TMS) as the internal standard. Data for <sup>1</sup>H-NMR and <sup>13</sup>C-NMR are reported as follows: s = singlet, d = doublet, t = triplet, dd = doublet of doublets, m = multiplet.

X-ray photoelectron spectroscopy (XPS) spectra were recorded using a PHI 5000 Versa Probe high-performance electron spectrometer, coupled with monochromatic Al-K $\alpha$  radiation (1486.6 eV) operating at an accelerating X-ray power of 50 W and 15 kV. The sample was outgassed at 25 °C in a UHV chamber (<5 × 10<sup>-7</sup> Pa) before the measurement.

Inductively coupled plasma-mass spectrometer (ICP-MS) was used to estimate the amount of copper in the catalyst using ICP-MS, Agilent Technologies 7700 series. Then, 2 mg of sample in 10 mL of aqua regia were digested in the microwave for 2 h at 185 °C. The resulting solution was diluted and analyzed using ICP-MS.

Transmission electron microscopy (TEM) images and elemental mapping were acquired on a Jeol TEM 2100 Plus operating at 120 kV. Samples were prepared by depositing a drop of diluted nanoparticle solution on a 300 mesh TEM gold grid and dried under vacuum for 24 h.

Gas chromatography-mass spectrometry (GC-MS) analysis was performed using an Agilent GC-MS (5977C) with triple Axis Detector with long life triple channel EM mass detector with (5%-phenyl)-methylpolysiloxane nonpolar column. GC-MS operating conditions: The initial oven

temperature was 50 °C, maintained for 1 min and then ramped to 270 °C at a rate of 5 °C/min followed by holding for 3 min at 270 °C. The initial temperature of the injector was 50 °C and then programmed at the same rate as the oven. Helium was used as a carrier gas with primary pressure of 570 KPa. The split injection mode was used with a split ratio of 10.0. The injection volume of each sample was 1 µL. Mass spectrometer settings: electron impact ionization mode with electron energy of 70 eV, ion source was set at 270 °C and scan mass range  $m/z$  50–550. *Thermogravimetric analysis (TGA)* was performed using a thermogravimetric analyzer (Perkin Elmer STA 8000) at an N<sub>2</sub> flow rate of 10 mL/min and a heating rate of 10 °C/min.

*The diffuse ultraviolet-visible reflectance spectra* were measured using a Shimadzu UV/Vis spectrophotometer (UV 2600) with BaSO<sub>4</sub> as an internal standard.

## **Section B: Experimental Section**

### **Synthetic procedures for catalyst ESP-PEI-Cu<sup>II</sup>O-NS**

To obtain large and uniform cavity spore precursor which is free of other genetic materials for the synthesis of ESP-PEI-Cu<sup>II</sup>O-NS nanostars, raw lycopodium clavatum sporopollenin powder, by following the reported procedure.<sup>S1</sup> Briefly, the synthesis of ESP-PEI-Cu<sup>II</sup>O-NS was achieved by three-step processes.

- i) Raw spores (100 g) were refluxed in acetone (500 mL) for 4 h, filtered and dried to yield deflated spores. After refluxing in 6% KOH solution (500 mL) for 6 h, it was filtered and the process was repeated once more. The spores were washed with hot water (2 × 50 mL), hot ethanol (300 mL), and dried on an open air (15 h). Afterwards, it was suspended in 75% H<sub>3</sub>PO<sub>4</sub> (500 mL) and refluxed for 7 days, filtered, washed with water (3 × 600 mL), acetone (500 mL), 2M HCl (600 mL), 2M NaOH (600 mL), once again with water (5 × 500 mL) and acetone (600 mL) successively, and dried in open air to obtain ESP (80 g) as colourless powder.
- ii) The exine capsules (100 mg) were functionalized with PEI (50 mg) in DMF (10 mL) at 50 °C for 24 h using passive encapsulation technique. The solution was centrifuged and was successively with 3×100 mL H<sub>2</sub>O and 3×100 mL EtOH and dried overnight in vacuum oven at 50 °C, and was named as ESP-PEI (100 mg) as faint yellow coloured solid.
- iii) Treatment of PEI functionalized sporopollenin (ESP-PEI, 50 mg) with CuCl<sub>2</sub> (100 mg) in EtOH/H<sub>2</sub>O 1:1 medium for 2 h and then was centrifuged and washed with 3 × 5 mL EtOH to generate Cu<sup>II</sup>O nanostar (ESP-PEI-Cu<sup>II</sup>O-NS) which was then vacuum oven dried at 50 °C for overnight to obtain 40 mg of faint green colored solid.

### Section C: Characterization of ESP-PEI-Cu<sup>II</sup>O-NS.

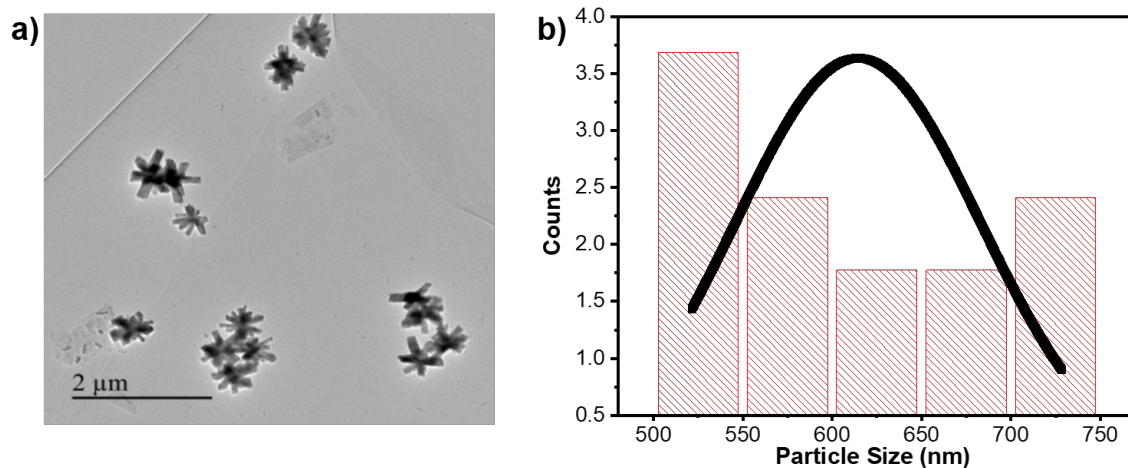

**Fig. S1** (a) TEM of ESP-PEI-Cu<sup>II</sup>O-NS (b) Size distribution curve for ESP-PEI-Cu<sup>II</sup>O-NS.

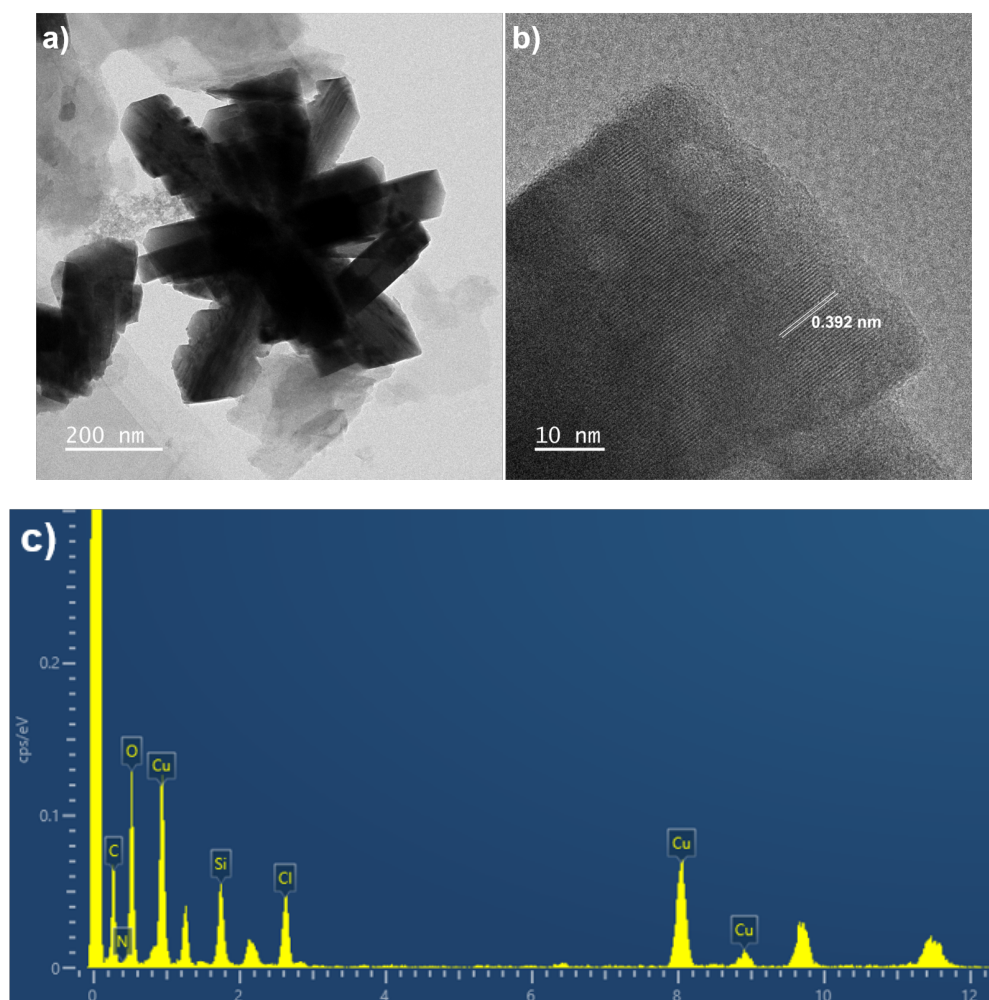

**Fig. S2** (a) TEM (b) HR-TEM (c) An energy dispersive analysis of X-rays (EDAX) of ESP-PEI-Cu<sup>II</sup>O-NS.

**Table S1** TEM-EDAX measurement of ESP-PEI-Cu<sup>I/II</sup>O-NS.

| Elements      | k-factor | Weight (%) |
|---------------|----------|------------|
| Carbon (C)    | 2.659    | 30.50      |
| Oxygen (O)    | 1.957    | 25.15      |
| Nitrogen (N)  | 3.391    | 0          |
| Copper (Cu)   | 1.359    | 28.02      |
| Chlorine (Cl) | 1.033    | 8.61       |
| Silicon (Si)  | 1.000    | 7.71       |

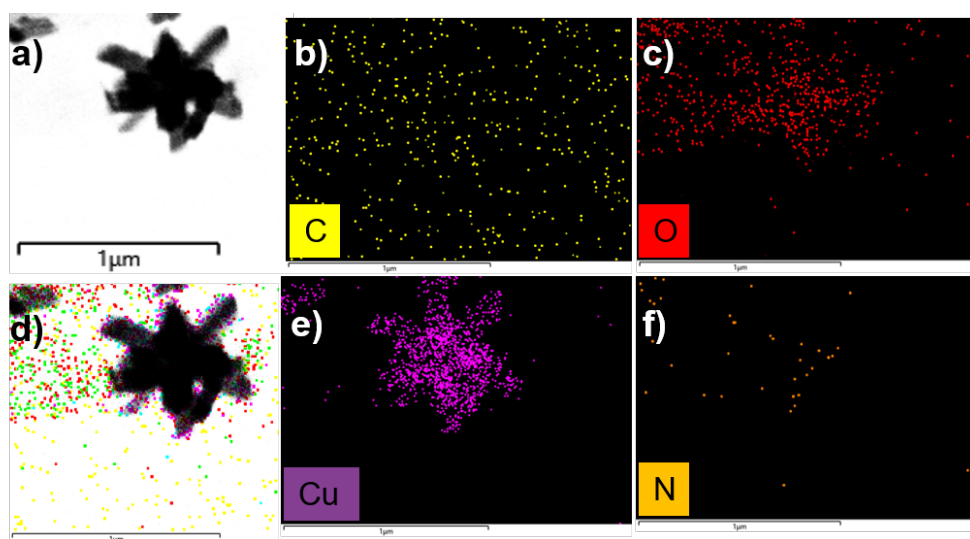

**Fig. S3** (a) TEM image of ESP-PEI-Cu<sup>I/II</sup>O-NS portion selected for mapping, (b) C, (c) O, (d) Overlapped image, (e) Cu, (f) N.

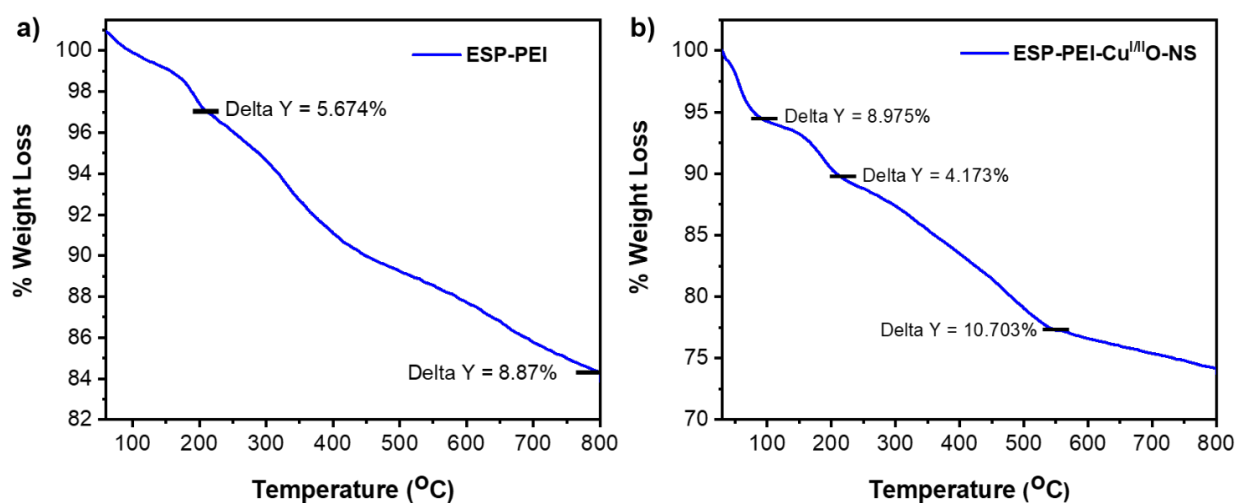

**Fig. S4** TGA decomposition pattern of (a) ESP-PEI (b) ESP-PEI-Cu<sup>I/II</sup>O-NS.

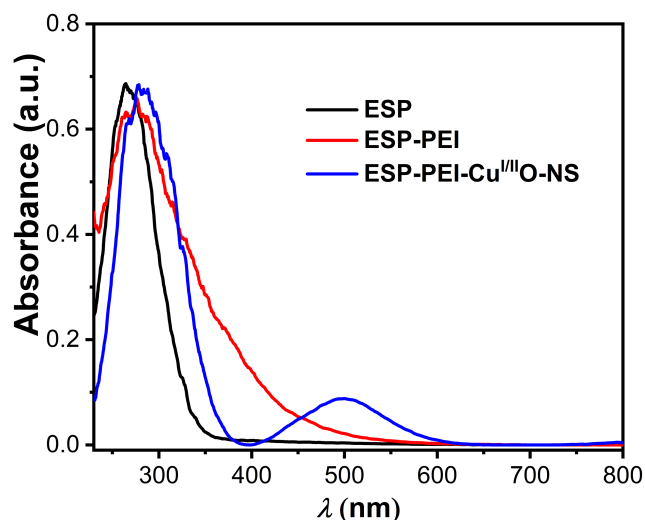

**Fig. S5** Comparative diffuse UV/Vis reflectance spectra of ESP, ESP-PEI, ESP-PEI-Cu<sup>II</sup>O-NS.

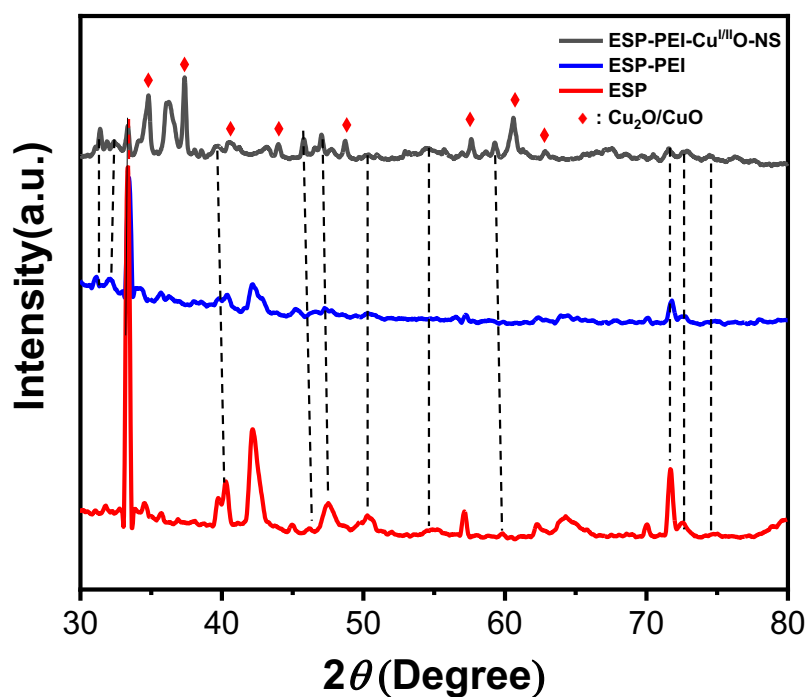

**Fig. S6** Overlapped XRD spectra of ESP, ESP-PEI, ESP-PEI-Cu<sup>II</sup>O-NS.

**A time-resolved study of product yield and copper release:** In seven separate 10 mL open round-bottom flasks equipped with a magnetic stir bar, 2 mL of H<sub>2</sub>O, azide **1b** (0.134 mmol), and alkyne **2a** (0.134 mmol) were added. Additionally, ESP-PEI-Cu<sup>II</sup>O-NS (2 mg) was introduced into each flask. The reaction mixtures were stirred at 25 °C for varying durations (6–24 h). Afterwards, the product was isolated from the reaction mixture by solvent extraction using CH<sub>2</sub>Cl<sub>2</sub>, and the yield was determined by <sup>1</sup>H-NMR spectroscopy, using 1,3,5-trimethoxybenzene as an internal standard. The aqueous layer was then centrifuged to separate

the heterogeneous catalyst, and the supernatant was analyzed by ICP-MS to measure the release of copper.

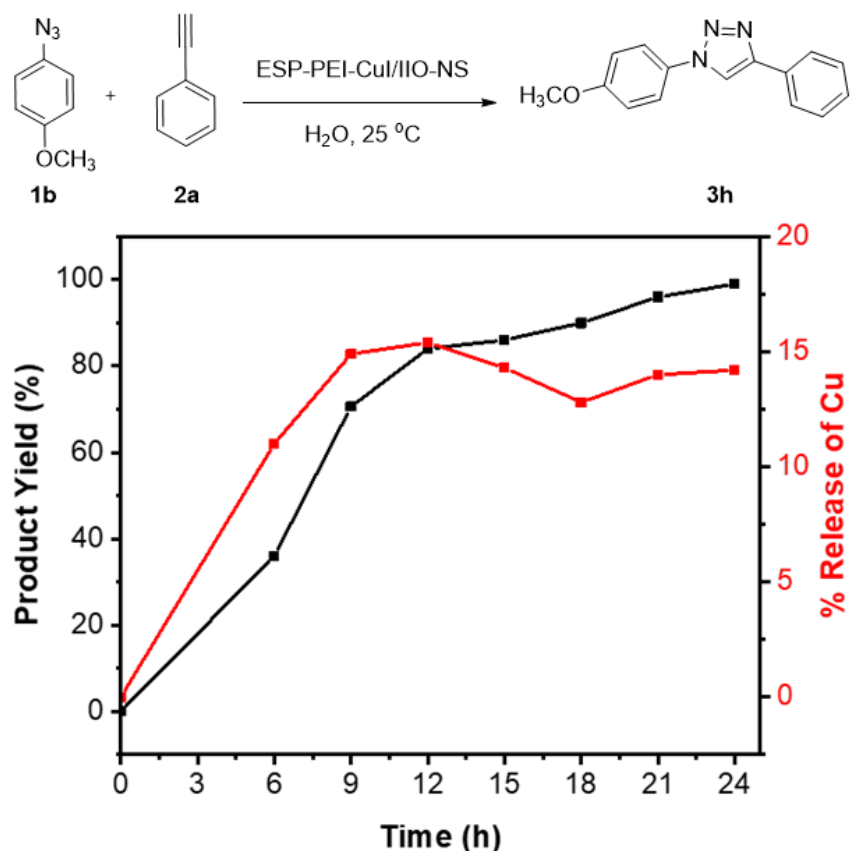

**Fig. S7** Graph of copper release versus catalytic product yields over time.

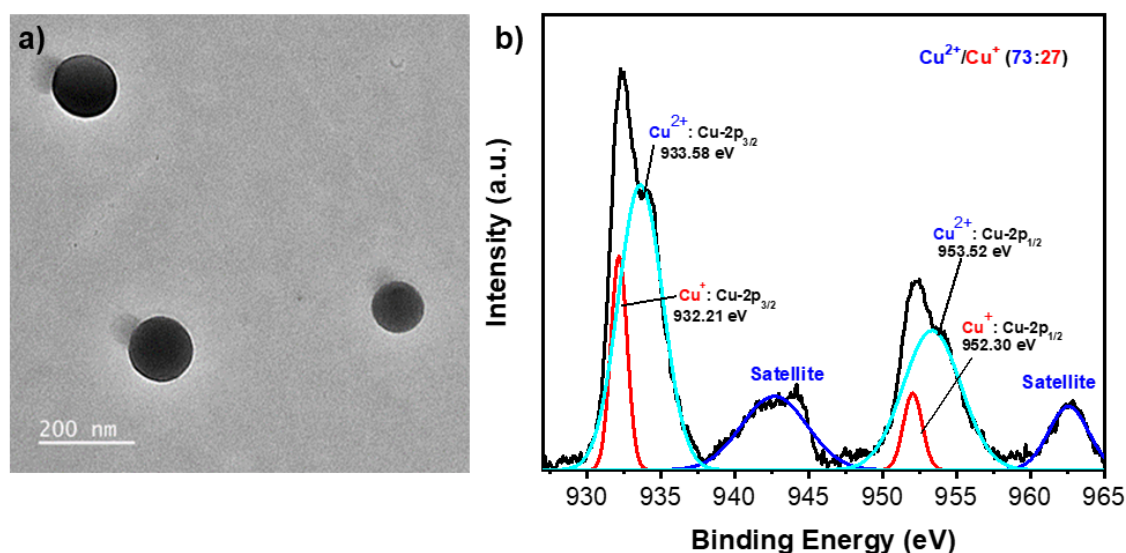

**Fig. S8** a) TEM image of reusable ESP-PEI-Cu<sup>II</sup>O-NS after 5<sup>th</sup> cycle, b) XPS of reusable ESP-PEI-Cu<sup>II</sup>O-NS after 5<sup>th</sup> cycle.



## Section D:

### i) Precursors synthesis for CuAAc reaction

#### Synthesis of 2,6-difluorobenzylazide<sup>S2</sup>

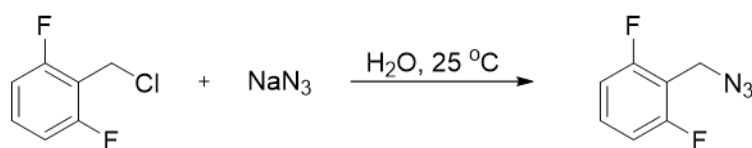

**1a.** 2,6-difluorobenzylazide was synthesized according to the literature procedure.<sup>[S2]</sup> Sodium azide (0.349 g, 5.376 mmol) was added in small portions to 2,6-difluorobenzylchloride (1 g, 4.8 mmol) in  $\text{H}_2\text{O}$  (250 mL) at 40 °C. Then the reaction mixture was stirred at 75 °C for 14 h, and then cooled to 25 °C. The aqueous layer was extracted with  $\text{CH}_2\text{Cl}_2$  ( $3 \times 300$  mL). The combined organic layers were washed with water and brine, dried over anhydrous  $\text{Na}_2\text{SO}_4$ , and evaporated to afford **1a** (0.79 g, 97.4%) as an oily liquid.

#### Synthesis of 4-methoxyphenylazide<sup>S3</sup>

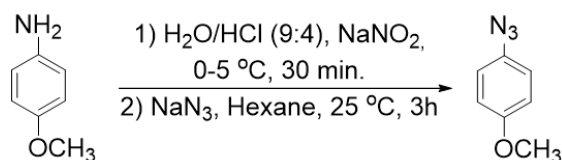

**1b.** *p*-Anisidine (1g, 0.008 mol) was dissolved in  $\text{H}_2\text{O}/\text{HCl}$  9:4 in a round bottom flask and stirred at 0-5 °C.  $\text{NaNO}_2$  (551 mg, 0.008 mol) dissolved in  $\text{H}_2\text{O}$  and was added dropwise to the flask with continuous stirring then aqueous solution of  $\text{NaN}_3$  (520 mg, 0.008 mol) was added to the reaction mixture and was allowed to stir at 25 °C for 2 h. The resultant mixture was extracted with  $\text{CH}_2\text{Cl}_2$  and washed successively with  $\text{H}_2\text{O}$  ( $3 \times 100$  mL). Organic layer was dried over anhydrous  $\text{Na}_2\text{SO}_4$  and the solvent was evaporated to afford **1b** (0.96 g, 80.7%) as a yellow liquid.

#### Synthesis of phenylazide<sup>S3</sup>

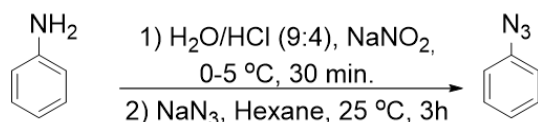

**1c.** Aniline (1.47 mL, 16 mmol) was dissolved in  $\text{H}_2\text{O}$  (25 mL) and conc.  $\text{H}_2\text{SO}_4$  (5 mL) was added at 0 °C. Then  $\text{NaNO}_2$  (1.28 g, 18.5 mmol) dissolved in  $\text{H}_2\text{O}$  (7 mL) was added dropwise. Followed by hexane (24 mL), and  $\text{NaN}_3$  (1.26 g, 19.3 mmol) in  $\text{H}_2\text{O}$  (10 mL) was added and the reaction was stirred for 3 h at 25 °C. The organic phase was separated, washed with  $\text{H}_2\text{O}$  ( $3 \times 50$  mL), dried with  $\text{MgSO}_4$  and filtered. The solvent was removed in vacuo, yielding compound **1c** (1.44 g, 75.4%) as pale-yellow oil.

ii) **General procedure for ESP-PEI-Cu<sup>III</sup>O-NS catalyzed azide-alkyne cycloaddition reaction**

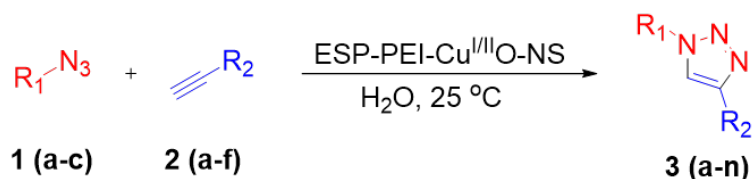

A 10 mL open round-bottom flask with a magnetic stir bar was charged with 1 mL of H<sub>2</sub>O, azide **1a-c** (1.0 equiv.), alkyne **2a-e** (1.0 equiv.) and ESP-PEI-Cu<sup>III</sup>O-NS (1 mg) was added. The reaction mixture was allowed to stir at 25 °C and reaction was monitored through thin-layer chromatography (TLC). After completion of the reaction, the product was separated from the reaction mixture by the solvent extraction in CH<sub>2</sub>Cl<sub>2</sub> (3 × 10 mL), washed with H<sub>2</sub>O and the organic layer was dried over anhydrous Na<sub>2</sub>SO<sub>4</sub>. The solvent was removed *in vacuo* to yield the triazole **3a-n** product.

iii) **Spectral details of triazole products:**

**1-(2,6-difluorobenzyl)-4-phenyl-1H-1,2,3-triazole**

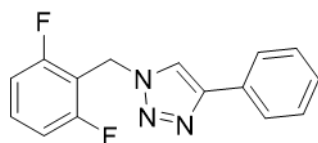

**3a.**<sup>S4</sup> <sup>1</sup>H NMR (400 MHz, CDCl<sub>3</sub>):  $\delta$  = 5.67 (s, 2H), 6.99 (t,  $J$  = 7.88 Hz, 2H), 7.29-7.32 (m, 1H), 7.35-7.41 (m, 3H), 7.78 (d,  $J$  = 6.6 Hz, 2H), 7.81 ppm (s, 1H); <sup>13</sup>C NMR (100 MHz, CDCl<sub>3</sub>):  $\delta$  = 41.59 (t, <sup>3</sup> $J_{CF}$  = 3.97 Hz), 111.03 (t, <sup>3</sup> $J_{CF}$  = 18.77 Hz), 111.87-112.13 (m), 119.62, 125.89, 128.31, 128.92, 130.62, 131.58 (t, <sup>3</sup> $J_{CF}$  = 10.47 Hz), 148.26, 161.56 ppm (dd, <sup>1</sup> $J_{CF}$  = 249.86, Hz, <sup>3</sup> $J_{CF}$  = 6.91 Hz)

**1-(2,6-difluorobenzyl)-4-(p-tolyl)-1H-1,2,3-triazole**

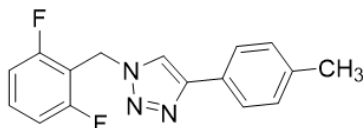

**3b.**<sup>S2</sup> <sup>1</sup>H NMR (400 MHz, CDCl<sub>3</sub>):  $\delta$  = 2.36 (s, 3H), 5.66 (s, 2H), 6.96-7.00 (m, 2H), 7.20 (d,  $J$  = 7 Hz, 2H), 7.32-7.41 (m, 1H), 7.69 (d,  $J$  = 8.12 Hz, 2H), 7.73 ppm (s, 1H); <sup>13</sup>C NMR (100 MHz, CDCl<sub>3</sub>): <sup>13</sup>C NMR (100 MHz, DMSO-*d*<sub>6</sub>):  $\delta$  = 21.37, 41.51 (t, <sup>3</sup> $J_{CF}$  = 3.97 Hz), 111.07 (<sup>3</sup> $J_{CF}$  = 18.78 Hz), 111.86-112.11 (m), 119.26, 125.78, 127.80, 129.67, 131.54 (t, <sup>3</sup> $J_{CF}$  = 10.11 Hz), 138.14, 148.33, 161.59 ppm (dd, <sup>1</sup> $J_{CF}$  = 6.86, <sup>3</sup> $J_{CF}$  = 7.29 Hz).

**methyl 1-(2,6-difluorobenzyl)-1H-1,2,3-triazole-4-carboxylate**

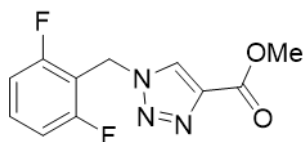

**3c.**<sup>S2</sup> <sup>1</sup>H NMR (400 MHz, DMSO-*d*<sub>6</sub>):  $\delta$  = 3.82 (s, 3H), 5.74 (s, 2H), 7.18 (t,  $J$  = 8.28, 2H), 7.49-7.56 (m, 1H), 8.85 ppm (s, 1H); <sup>13</sup>C NMR (100 MHz, DMSO-*d*<sub>6</sub>):  $\delta$  = 41.35 (t,  $^3J_{CF}$  = 3.61 Hz), 51.83, 110.83 (t,  $^3J_{CF}$  = 18.77 Hz), 11.85-112.09 (m), 129.47, 131.90 (t,  $^3J_{CF}$  = 10.47 Hz), 138.49, 160.56, 160.81 ppm (dd,  $^3J_{CF}$  = 248.02,  $^3J_{CF}$  = 7.29 Hz).

**1-(2,6-difluorobenzyl)-4-(4-methoxyphenyl)-1H-1,2,3-triazole**

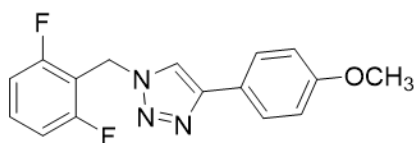

**3d.** <sup>1</sup>H NMR (400 MHz, CDCl<sub>3</sub>):  $\delta$  = 3.83 (s, 3H), 5.66 (s, 2H), 6.92-7.00 (m, 4H), 7.33-7.41 (m, 1H), 7.69-7.74 ppm (m, 3H); <sup>13</sup>C NMR (100 MHz, CDCl<sub>3</sub>):  $\delta$  = 41.50 (t,  $^3J_{CF}$  = 3.97 Hz), 55.45, 111.10 (t,  $^3J_{CF}$  = 15.88 Hz), 11.86-112.12 (m), 114.33, 118.82, 123.37, 127.20, 131.54 (t,  $^3J_{CF}$  = 10.47 Hz), 148.13, 159.76, 161.57 ppm (dd,  $^1J_{CF}$  = 279.96,  $^3J_{CF}$  = 6.86 Hz).

**4-(4-chlorophenyl)-1-(2,6-difluorobenzyl)-1H-1,2,3-triazole**

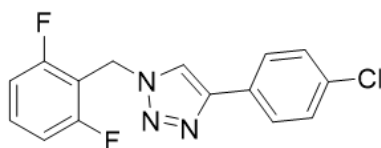

**3e.** <sup>1</sup>H NMR (400 MHz, CDCl<sub>3</sub>):  $\delta$  = 5.67 (s, 2H), 6.99 (t,  $J$  = 7.88 Hz, 2H), 7.35-7.42 (m, 3H), 7.73-7.77 ppm (m, 3H); <sup>13</sup>C NMR (100 MHz, CDCl<sub>3</sub>):  $\delta$  = 41.93 (t,  $^3J_{CF}$  = 3.97 Hz), 112.23-112.49 (m), 120.01, 127.27, 127.45, 129.44, 131.99 (t,  $^3J_{CF}$  = 10.01 Hz), 134.39, 135.38, 147.55, 163.12 ppm (dd,  $^1J_{CF}$  = 249.82,  $^3J_{CF}$  = 6.86 Hz).

**4-(4-bromophenyl)-1-(2,6-difluorobenzyl)-1H-1,2,3-triazole**

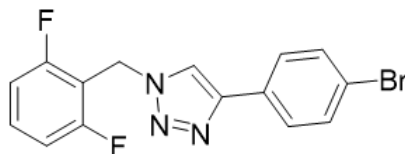

**3f.** <sup>1</sup>H NMR (400 MHz, CDCl<sub>3</sub>):  $\delta$  = 5.67 (s, 2H), 6.99 (t,  $J$  = 7.64 Hz, 2H), 7.34-7.41 (m, 1H), 7.52 (d,  $J$  = 8.48 Hz, 2H), 7.68 (d,  $J$  = 8.40 Hz, 2H), 7.74 (s, 1H) ppm; <sup>13</sup>C NMR (100 MHz, CDCl<sub>3</sub>):  $\delta$  = 41.61 (t,  $^3J_{CF}$  = 3.97 Hz), 110.88 (t,  $^3J_{CF}$  = 18.77 Hz), 111.90-112.16 (m), 119.72, 122.28, 127.40, 129.59, 131.67 (t,  $^3J_{CF}$  = 10.10 Hz), 132.07, 147.22, 161.53 ppm (dd,  $^3J_{CF}$  = 249.82, Hz  $^3J_{CF}$  = 6.50 Hz).

**methyl 1-(4-methoxyphenyl)-1H-1,2,3-triazole-4-carboxylate**

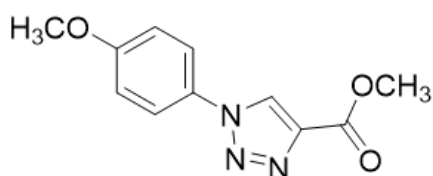

**3g.**<sup>S5</sup> <sup>1</sup>H NMR (400 MHz, CDCl<sub>3</sub>):  $\delta$  = 3.88 (s, 3H), 3.99 (s, 3H), 7.04 (d,  $J$  = 9.00 Hz, 2H), 7.65 (d,  $J$  = 9 Hz, 2H), 8.42 ppm (s, 1H); <sup>13</sup>C NMR (100 MHz, CDCl<sub>3</sub>):  $\delta$  = 52.78, 56.05, 115.42, 122.93, 126.07, 130.15, 140.82, 160.86, 161.60 ppm.

**1-(4-methoxyphenyl)-4-phenyl-1H-1,2,3-triazole**

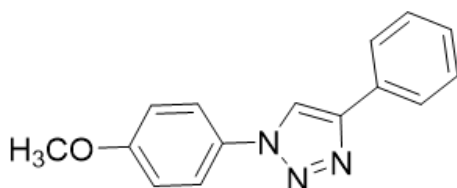

**3h.**<sup>S6</sup> <sup>1</sup>H NMR (400 MHz, CDCl<sub>3</sub>):  $\delta$  = 3.87 (s, 3H), 7.03 (d,  $J$  = 8.88 Hz, 2H), 7.34-7.38 (m, 1H), 7.43-7.47 (m, 2H), 7.68 (d,  $J$  = 8.88, 2H), 7.90 (d,  $J$  = 7.88 Hz, 2H), 8.12 ppm (s, 1H); <sup>13</sup>C NMR (100 MHz, CDCl<sub>3</sub>):  $\delta$  = 55.78, 114.93, 117.97, 122.32, 125.95, 128.46, 128.95, 130.52, 130.67, 148.35, 159.98 ppm.

**1,4-bis(4-methoxyphenyl)-1H-1,2,3-triazole**

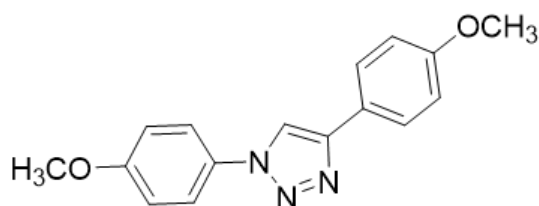

**3i.**<sup>S7</sup> <sup>1</sup>H NMR (400 MHz, CDCl<sub>3</sub>):  $\delta$  = 3.87(d,  $J$  = 7.36 Hz, 6H), 6.98-7.65 (m, 4H), 7.68 (d,  $J$  = 9 Hz, 2H), 7.83 (d,  $J$  = 8.76 Hz, 2H), 8.02 ppm (s, 1H); <sup>13</sup>C NMR (100 MHz, CDCl<sub>3</sub>):  $\delta$  = 55.50, 55.80, 114.47, 114.93, 117.17, 122.31, 123.24, 127.29, 130.79, 148.25, 159.90, 159.94 ppm.

**1-(4-methoxyphenyl)-4-(p-tolyl)-1H-1,2,3-triazole**

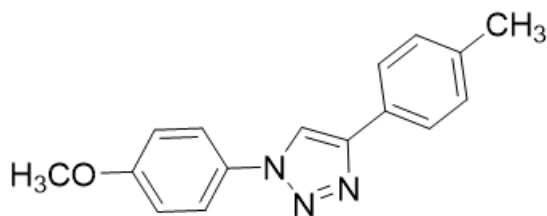

**3j.**<sup>S8</sup> <sup>1</sup>H NMR (400 MHz, CDCl<sub>3</sub>):  $\delta$  = 2.37 (s, 3H), 3.86 (s, 3H), 7.02 (d,  $J$  = 9.00 Hz, 2H), 7.25 (d,  $J$  = 5.72 Hz, 2H), 7.67 (d,  $J$  = 9.00 Hz, 2H), 7.78 (d,  $J$  = 8.12 Hz, 2H), 8.06 ppm (s, 1H); <sup>13</sup>C NMR (100 MHz, CDCl<sub>3</sub>):  $\delta$  = 21.44, 55.76, 114.90, 117.61, 122.28, 125.85, 127.69, 129.70, 130.72, 138.32, 148.42, 159.92 ppm.

#### 4-(4-bromophenyl)-1-(4-methoxyphenyl)-1H-1,2,3-triazole

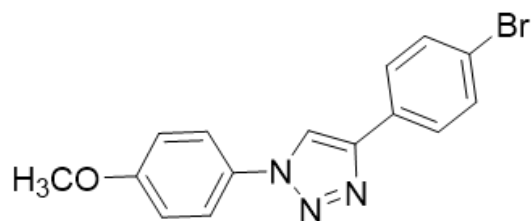

**3k.**<sup>S9</sup> <sup>1</sup>H NMR (400 MHz, DMSO-*d*<sub>6</sub>):  $\delta$  = 3.84 (s, 3H), 7.18 (d, *J* = 9.00 Hz, 2H), 7.71 (d, *J* = 8.52 Hz, 2H), 7.83-7.90 (m, 4H), 9.26 ppm (s, 1H); <sup>13</sup>C NMR (100 MHz, DMSO-*d*<sub>6</sub>):  $\delta$  = 55.66, 115.01, 120.10, 121.23, 121.77, 127.30, 129.70, 130.01, 132.06, 146.12, 159.43 ppm.

#### 4-(4-chlorophenyl)-1-(4-methoxyphenyl)-1H-1,2,3-triazole

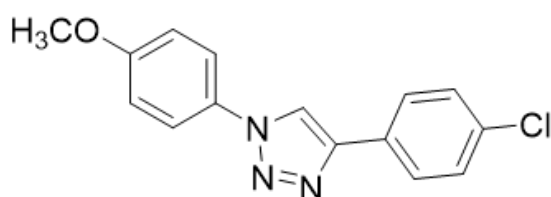

**3l.**<sup>S7</sup> <sup>1</sup>H NMR (400 MHz, DMSO-*d*<sub>6</sub>):  $\delta$  = 3.85 (s, 3H), 7.18 (d, *J* = 9.12 Hz, 2H), 7.58 (d, *J* = 8.52 Hz, 2H), 7.85 (d, *J* = 9.16 Hz, 2H), 7.95 (d, *J* = 6.48 Hz, 2H), 9.26 ppm (s, 1H); <sup>13</sup>C NMR (100 MHz, DMSO-*d*<sub>6</sub>):  $\delta$  = 55.67, 115.02, 120.10, 127.79, 127.03, 129.17, 129.36, 130.03, 132.65, 146.09, 159.44 ppm.

#### 1,4-diphenyl-1H-1,2,3-triazole

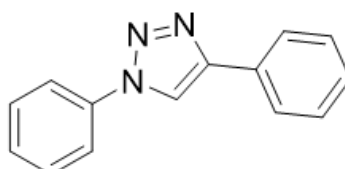

**3m.**<sup>S10</sup> <sup>1</sup>H NMR (400 MHz, DMSO-*d*<sub>6</sub>):  $\delta$  = 7.37-7.41 (m, 1H), 7.49-7.54 (m, 3H), 7.62-7.65 (m, 2H), 7.96 (d, *J* = 8.36 Hz, 4H), 9.30 ppm (s, 1H); <sup>13</sup>C NMR (100 MHz, DMSO-*d*<sub>6</sub>):  $\delta$  = 119.63, 120.03, 125.36, 128.27, 128.74, 129.01, 129.96, 130.26, 136.66, 147.34 ppm.

#### methyl 1-phenyl-1H-1,2,3-triazole-4-carboxylate

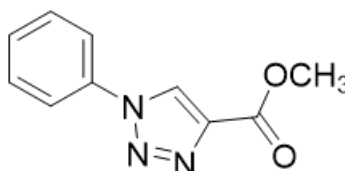

**3n.**<sup>S11</sup> <sup>1</sup>H NMR (400 MHz, CDCl<sub>3</sub>):  $\delta$  = 4.00 (s, 3H), 7.48-7.58 (m, 3H), 7.76 (d, *J* = 7.24 Hz, 2H), 8.52 (s, 1H) ppm; <sup>13</sup>C NMR (100 MHz, CDCl<sub>3</sub>):  $\delta$  = 52.52, 120.98, 125.70, 129.72, 130.01, 136.50, 140.72, 161.20 ppm.

*<sup>1</sup>H-, <sup>13</sup>C-NMR and mass spectral profiles of triazole-products*

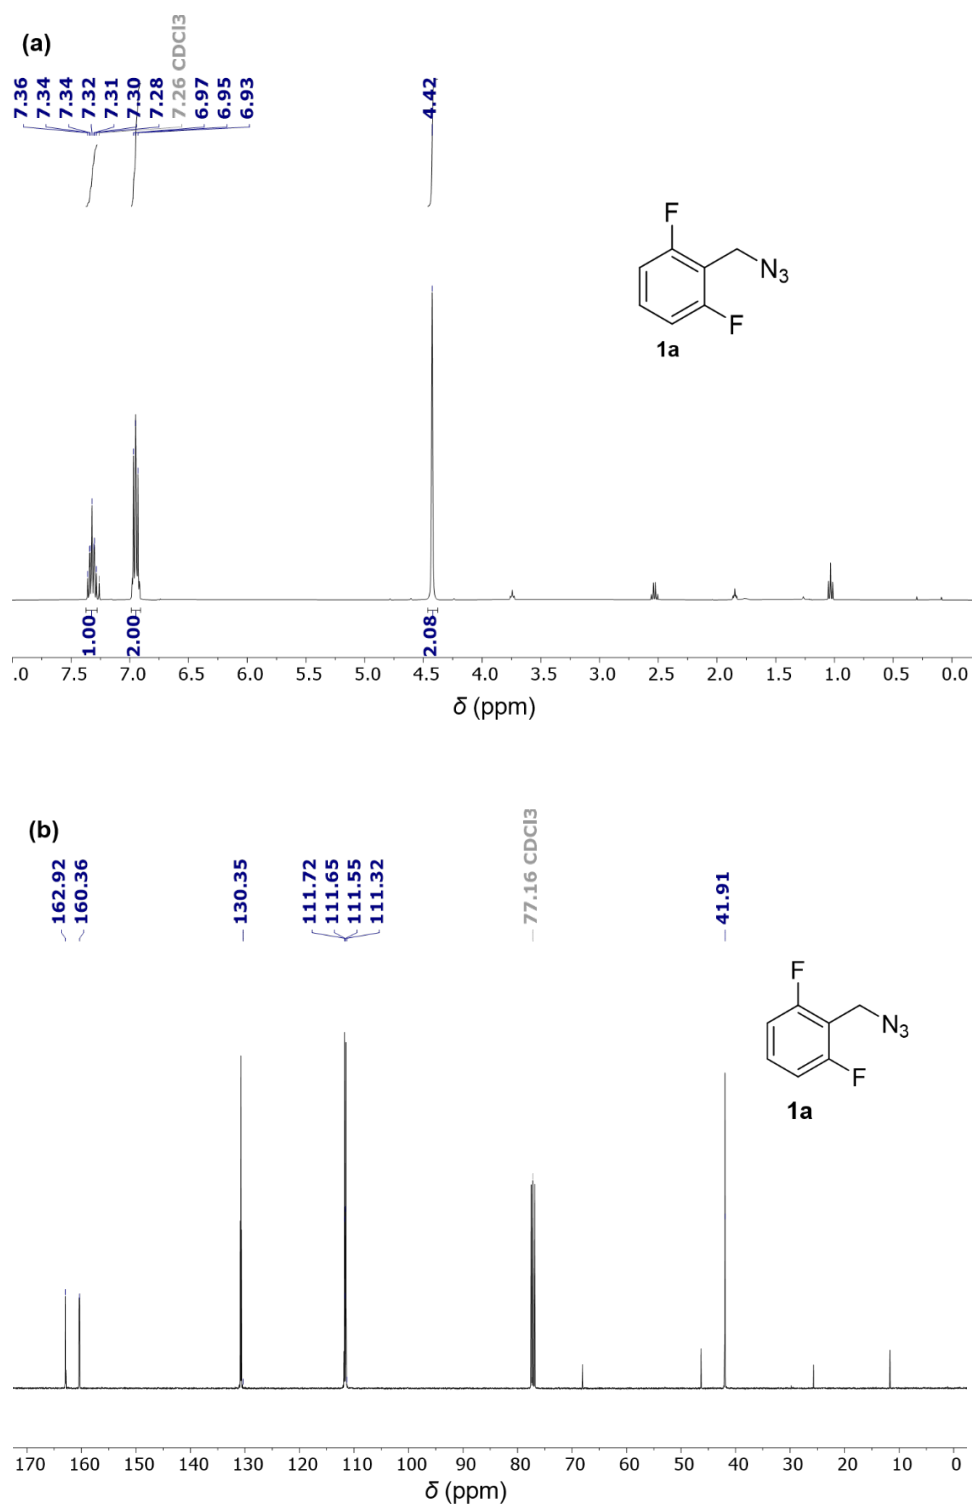

**Fig. S9** (a) <sup>1</sup>H-NMR (400 MHz, CDCl<sub>3</sub>, 298 K), (b) <sup>13</sup>C-NMR (100 MHz, CDCl<sub>3</sub>, 298 K) spectra of **1a**.

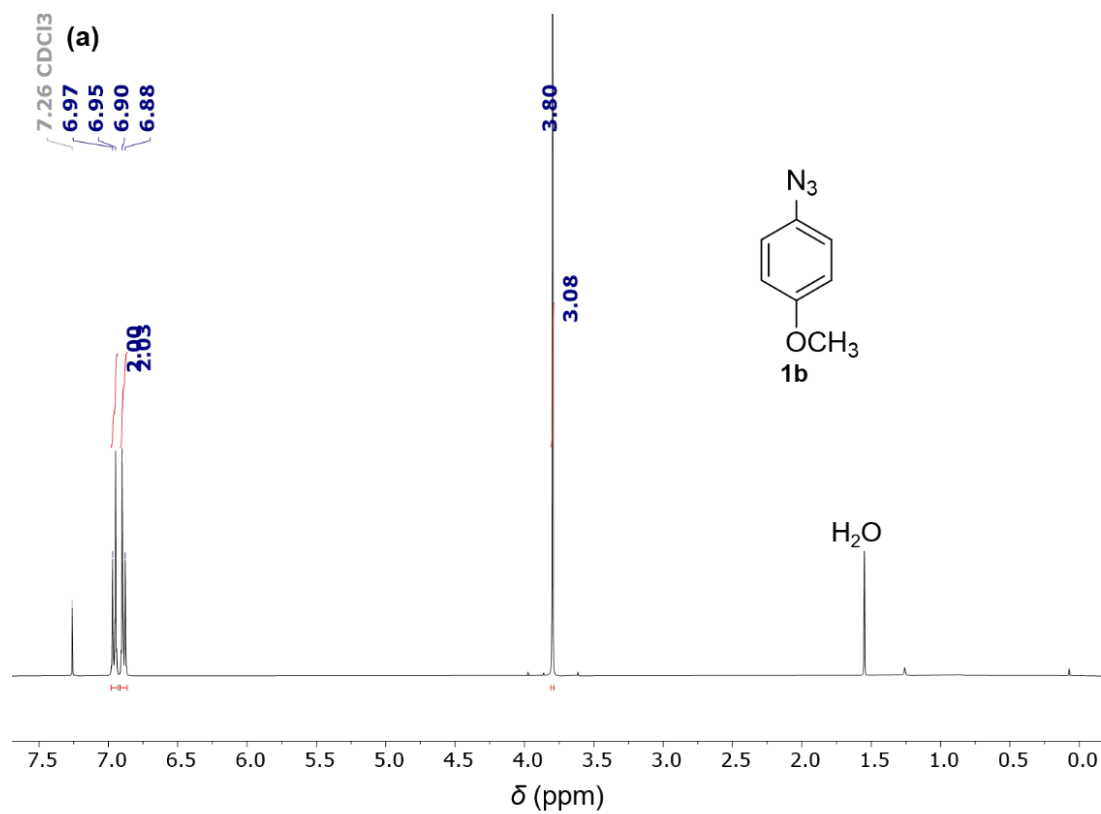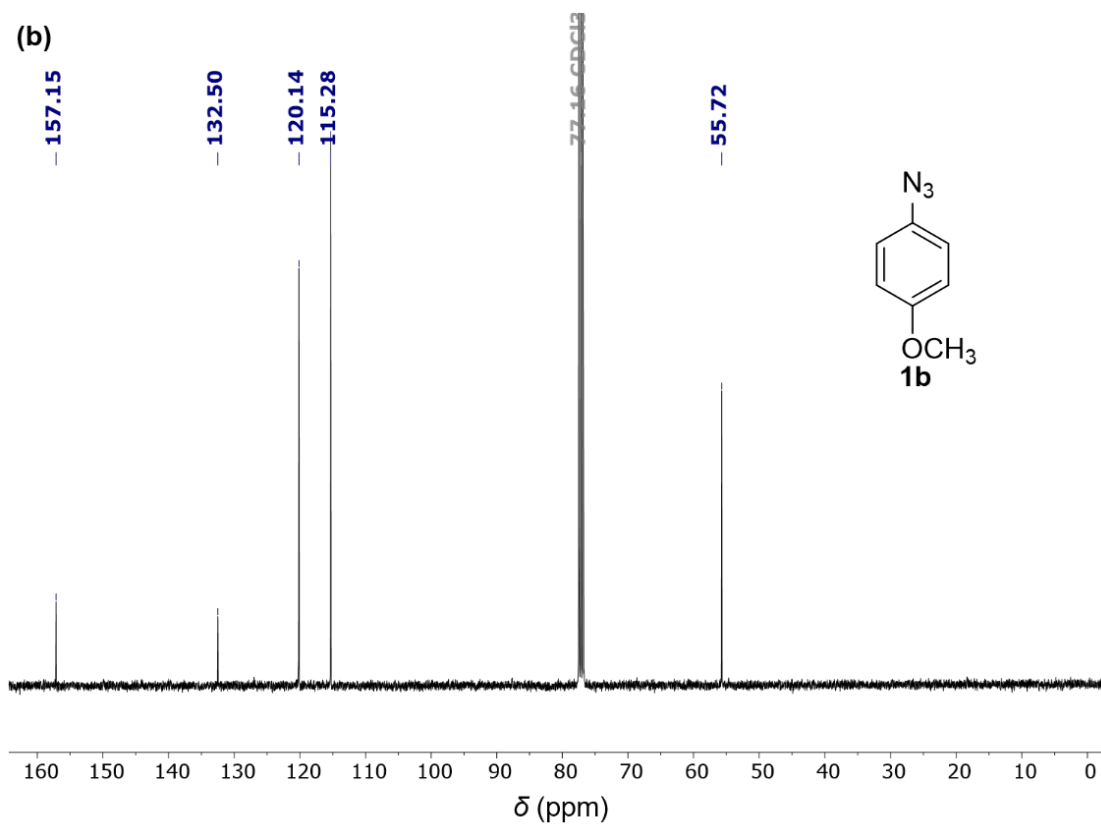

**Fig. S10** (a) <sup>1</sup>H-NMR (400 MHz, CDCl<sub>3</sub>, 298 K), (b) <sup>13</sup>C-NMR (100 MHz, CDCl<sub>3</sub>, 298 K) spectra of **1b**.

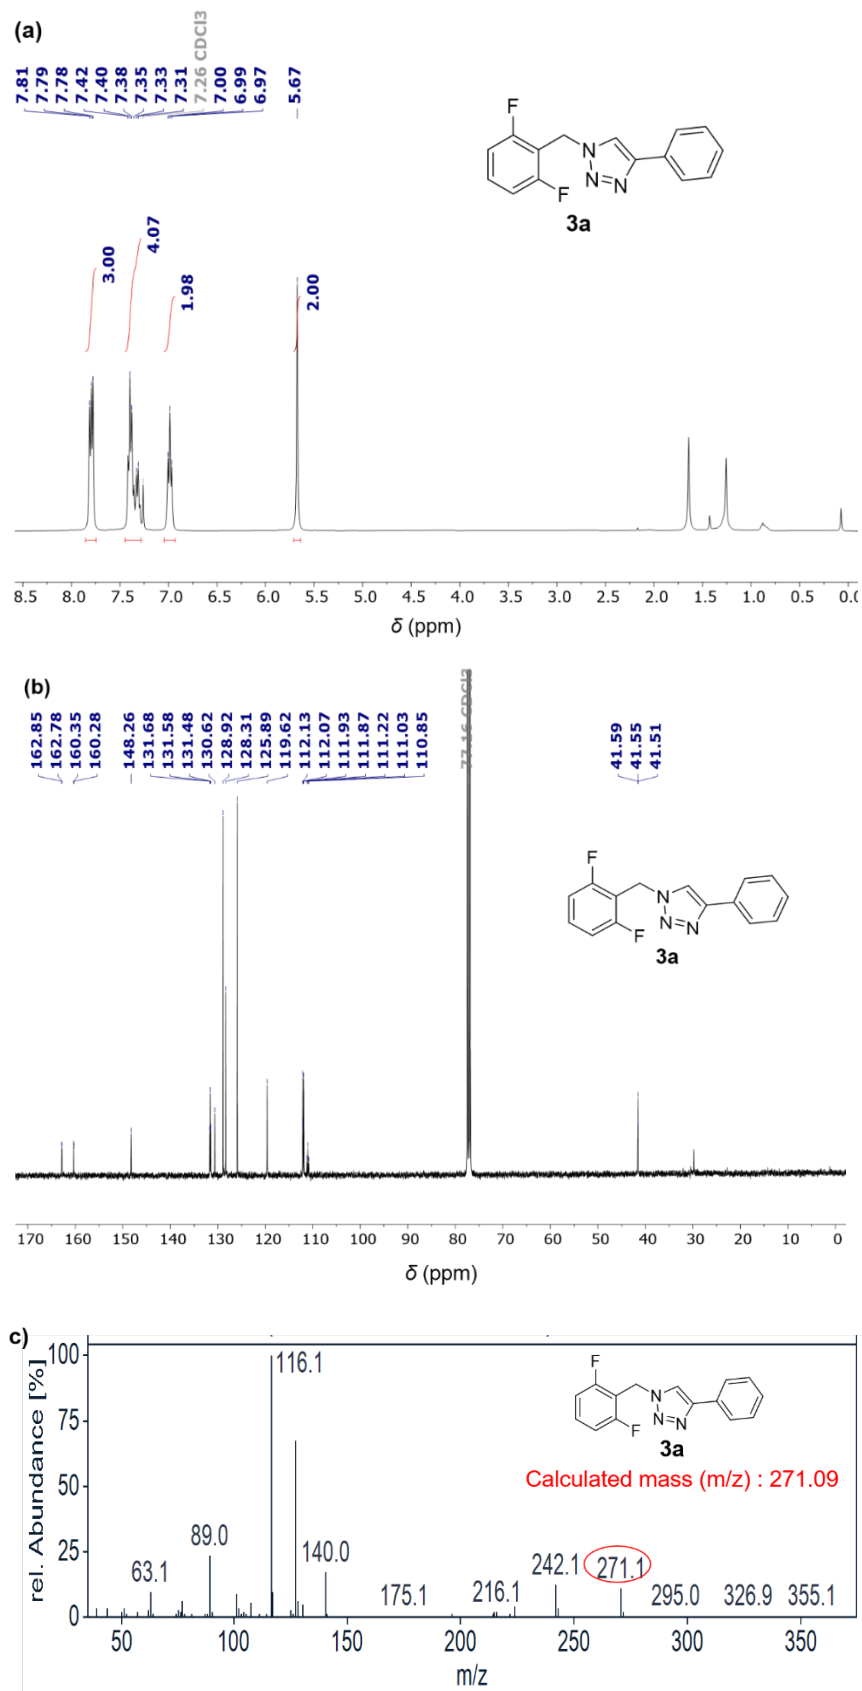

**Fig. S11** (a)  $^1\text{H-NMR}$  (400 MHz,  $\text{CDCl}_3$ , 298 K), (b)  $^{13}\text{C-NMR}$  (100) MHz,  $\text{CDCl}_3$ , 298 K), (c) GC-MS spectra of **3a**.



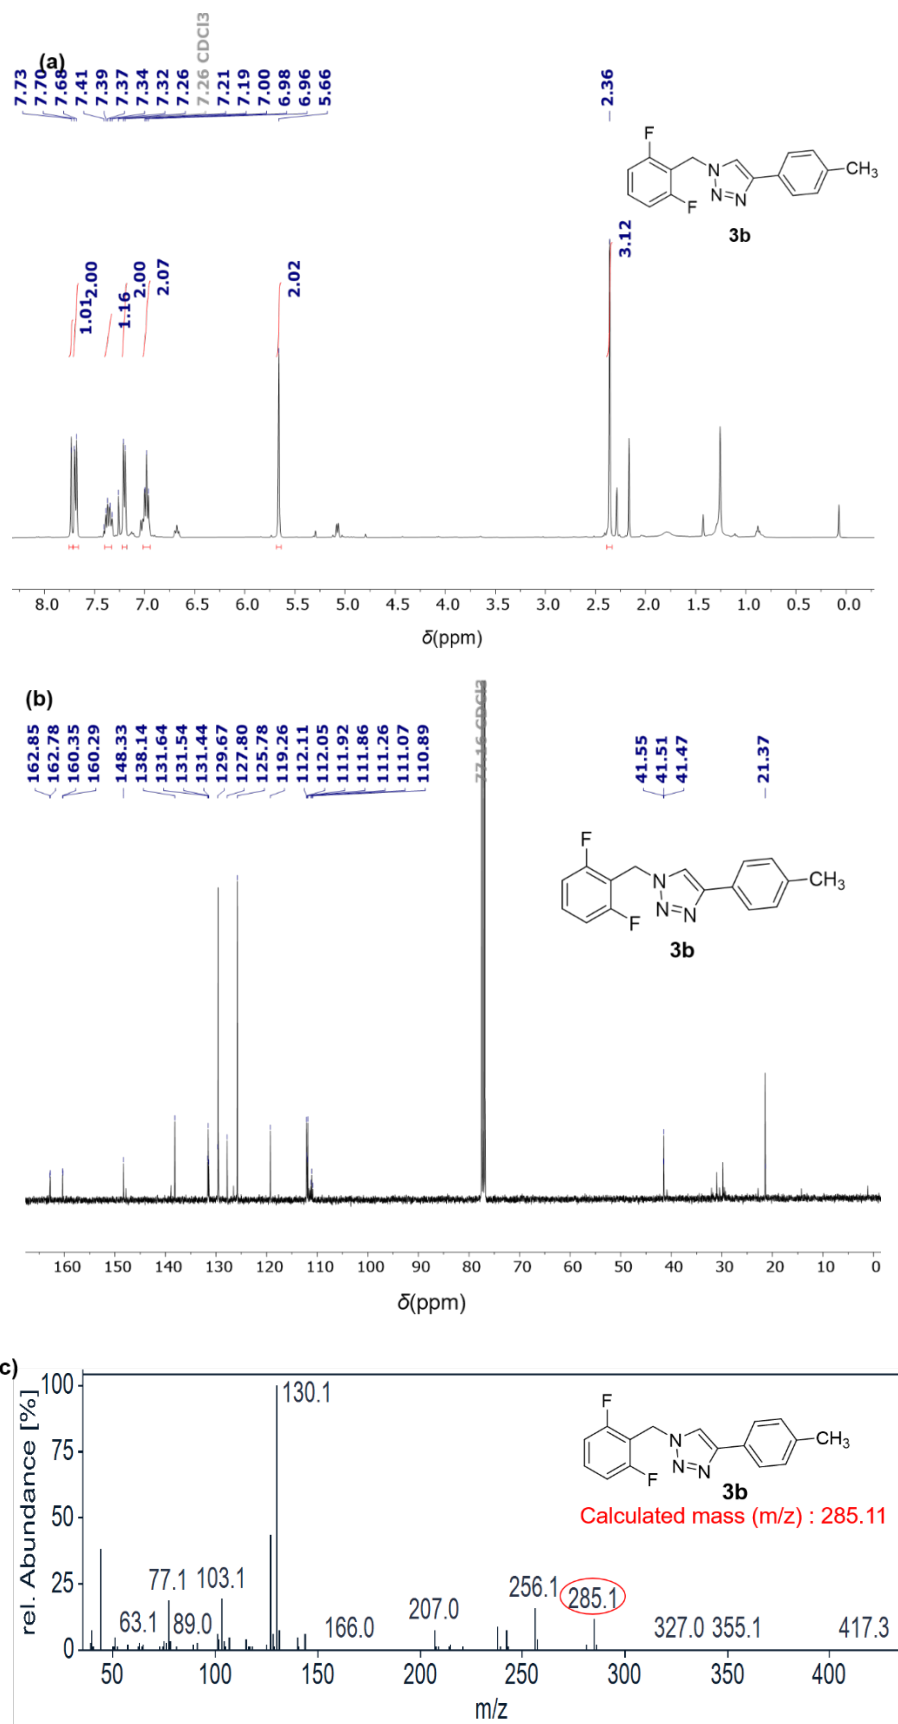

**Fig. S12** (a) <sup>1</sup>H-NMR (400 MHz, CDCl<sub>3</sub>, 298 K), (b) <sup>13</sup>C-NMR (100 MHz, CDCl<sub>3</sub>, 298 K), (c) GC-MS spectra of **3b**.

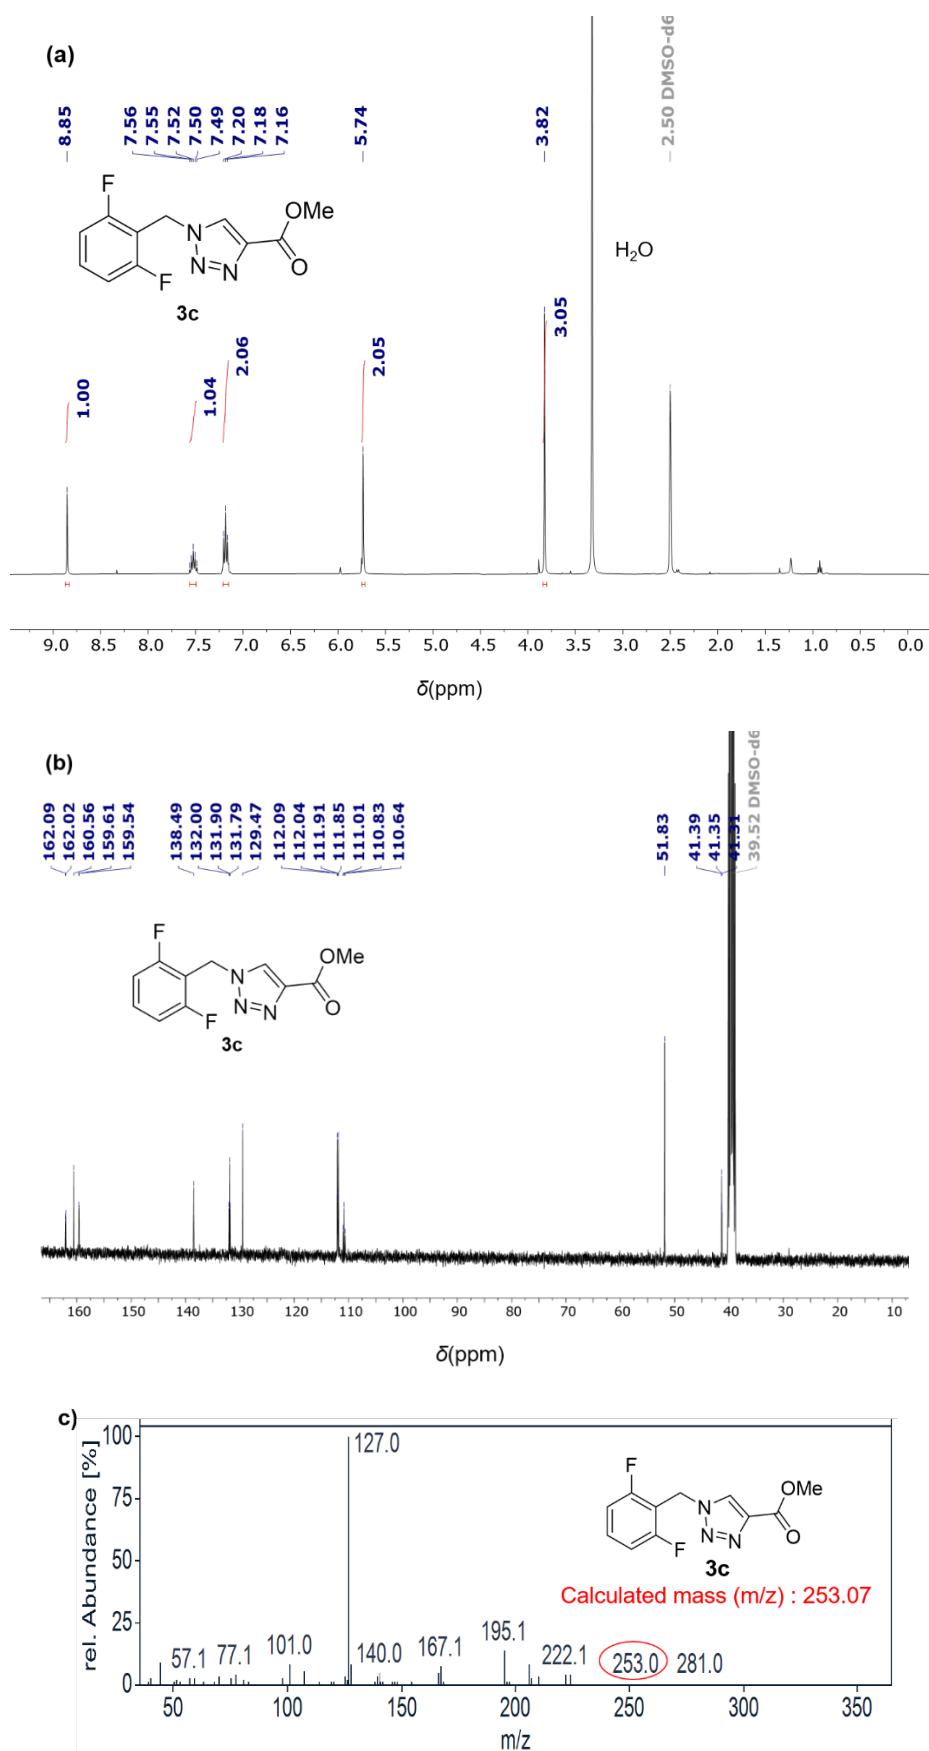

**Fig. S13** (a)  $^1\text{H-NMR}$  (400 MHz,  $\text{DMSO-}d_6$ , 298 K), (b)  $^{13}\text{C-NMR}$  (100 MHz,  $\text{DMSO-}d_6$ , 298 K), (c) GC-MS spectra of **3c**.

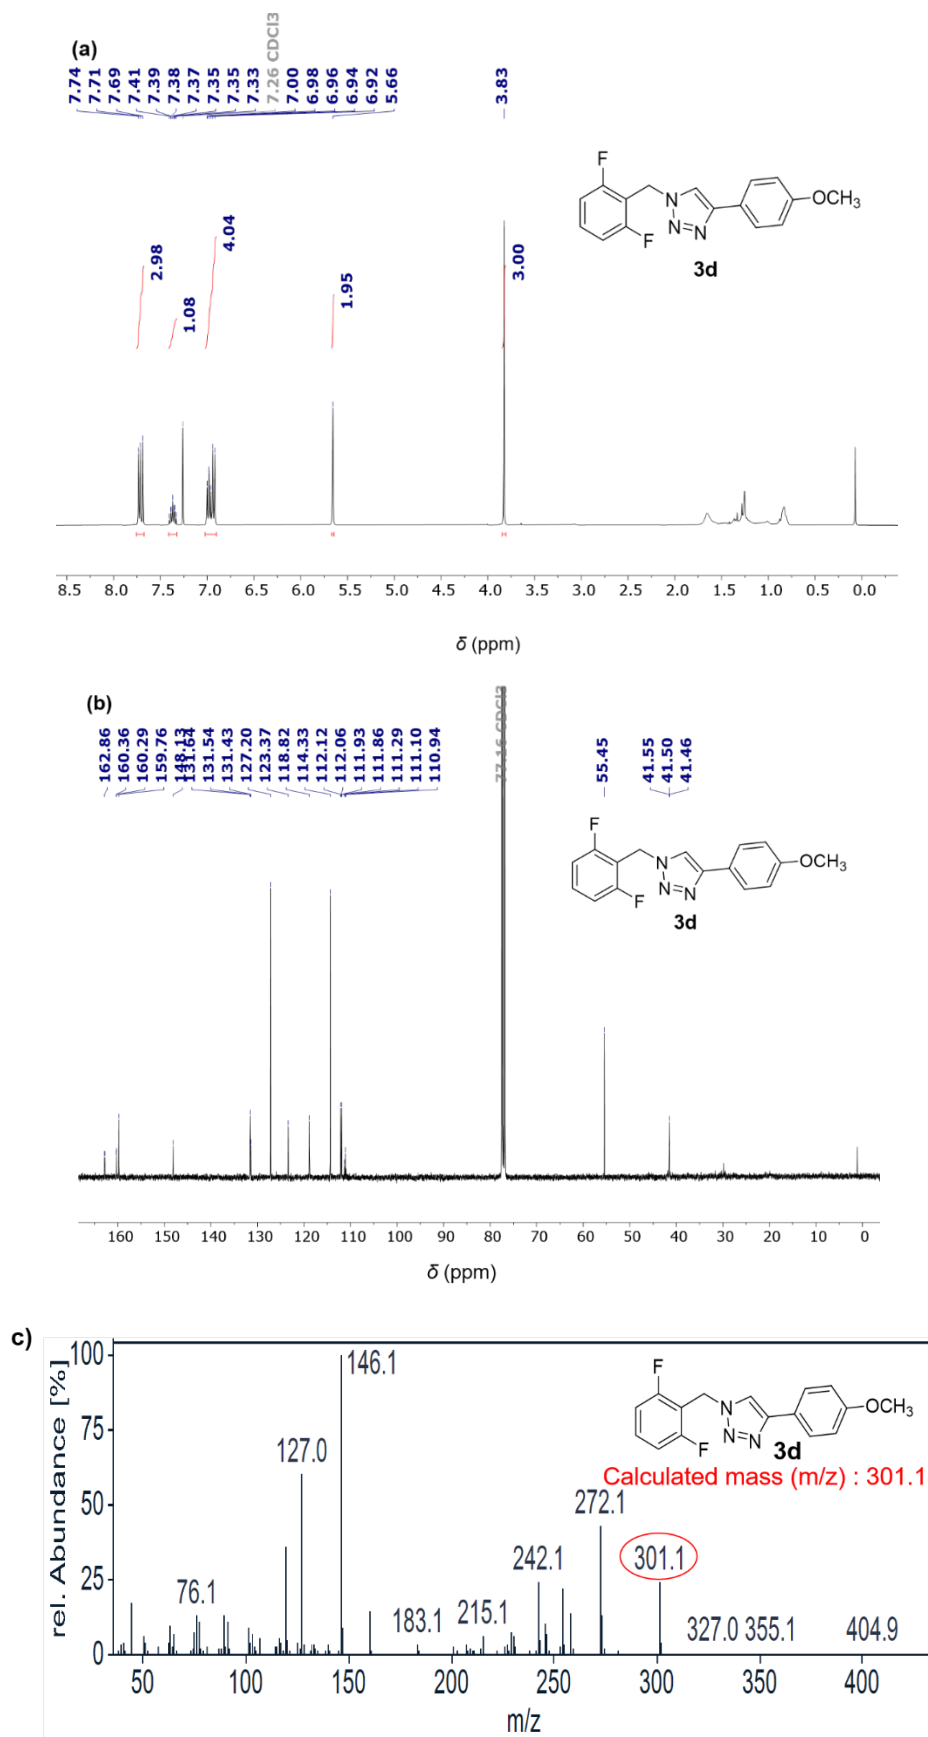

**Fig. S14** (a) <sup>1</sup>H-NMR (400 MHz, CDCl<sub>3</sub>, 298 K), (b) <sup>13</sup>C-NMR (100 MHz, CDCl<sub>3</sub>, 298 K), (c) GC-MS spectra of **3d**.

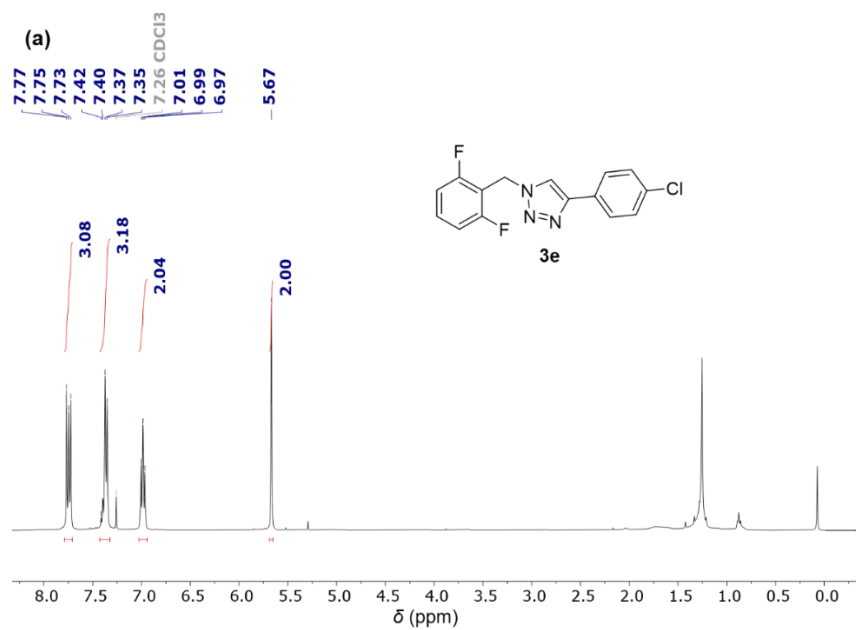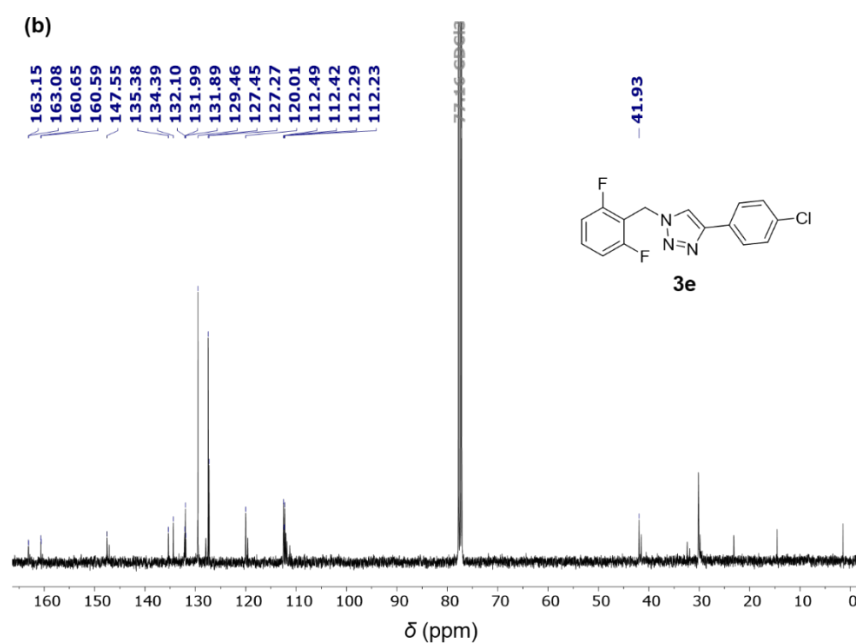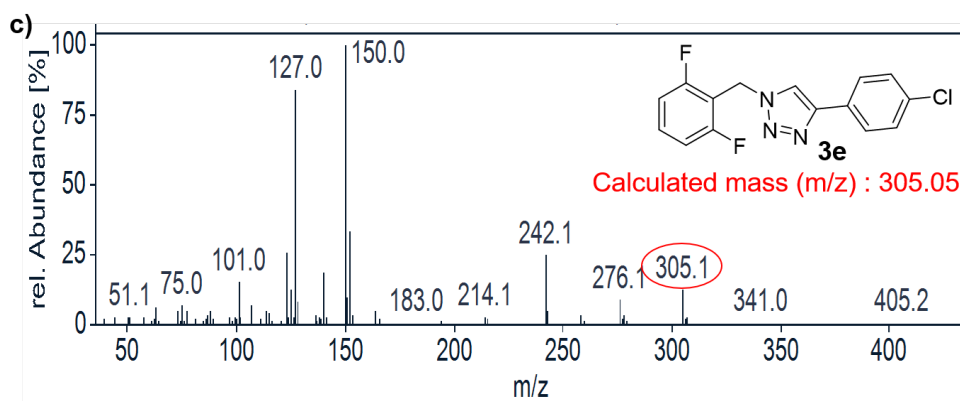

**Fig. S15** (a) <sup>1</sup>H-NMR (400 MHz, CDCl<sub>3</sub>, 298 K), (b) <sup>13</sup>C-NMR (100 MHz, CDCl<sub>3</sub>, 298 K), (c) GC-MS spectra of **3e**.

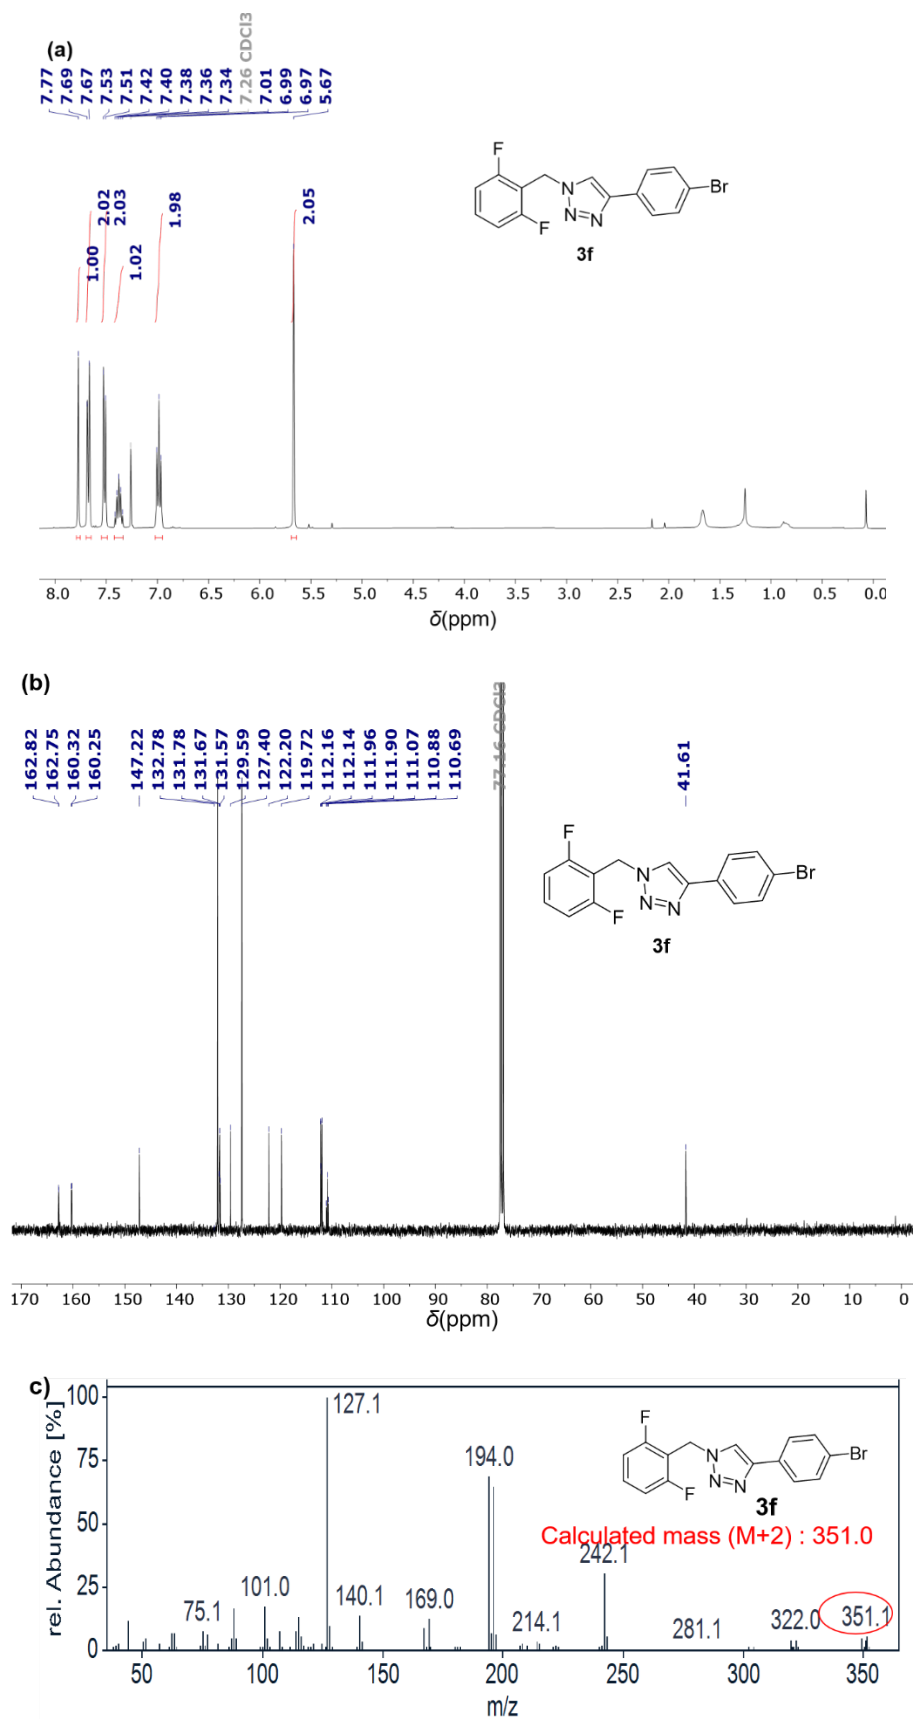

**Fig. S16** (a) <sup>1</sup>H-NMR (400 MHz, CDCl<sub>3</sub>, 298 K), (b) <sup>13</sup>C-NMR (100 MHz, CDCl<sub>3</sub>, 298 K), (c) GC-MS spectra of **3f**.

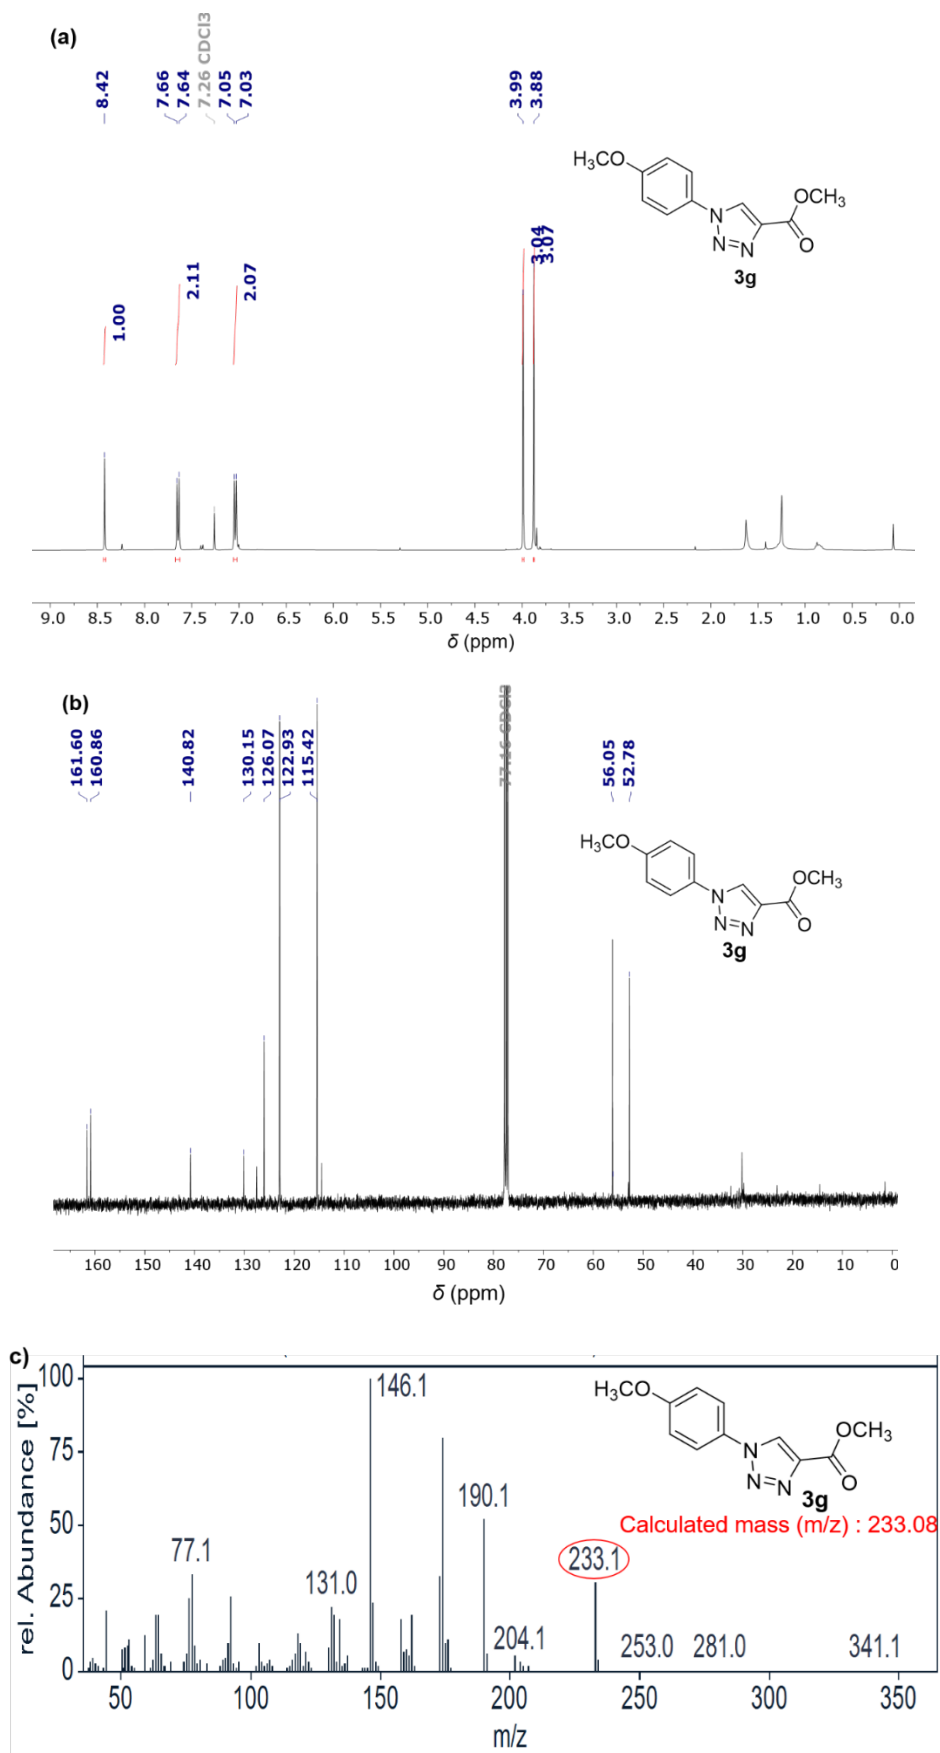

**Fig. S17** (a) <sup>1</sup>H-NMR (400 MHz, CDCl<sub>3</sub>, 298 K), (b) <sup>13</sup>C-NMR (100 MHz, CDCl<sub>3</sub>, 298 K), (c) GC-MS spectra of **3g**.

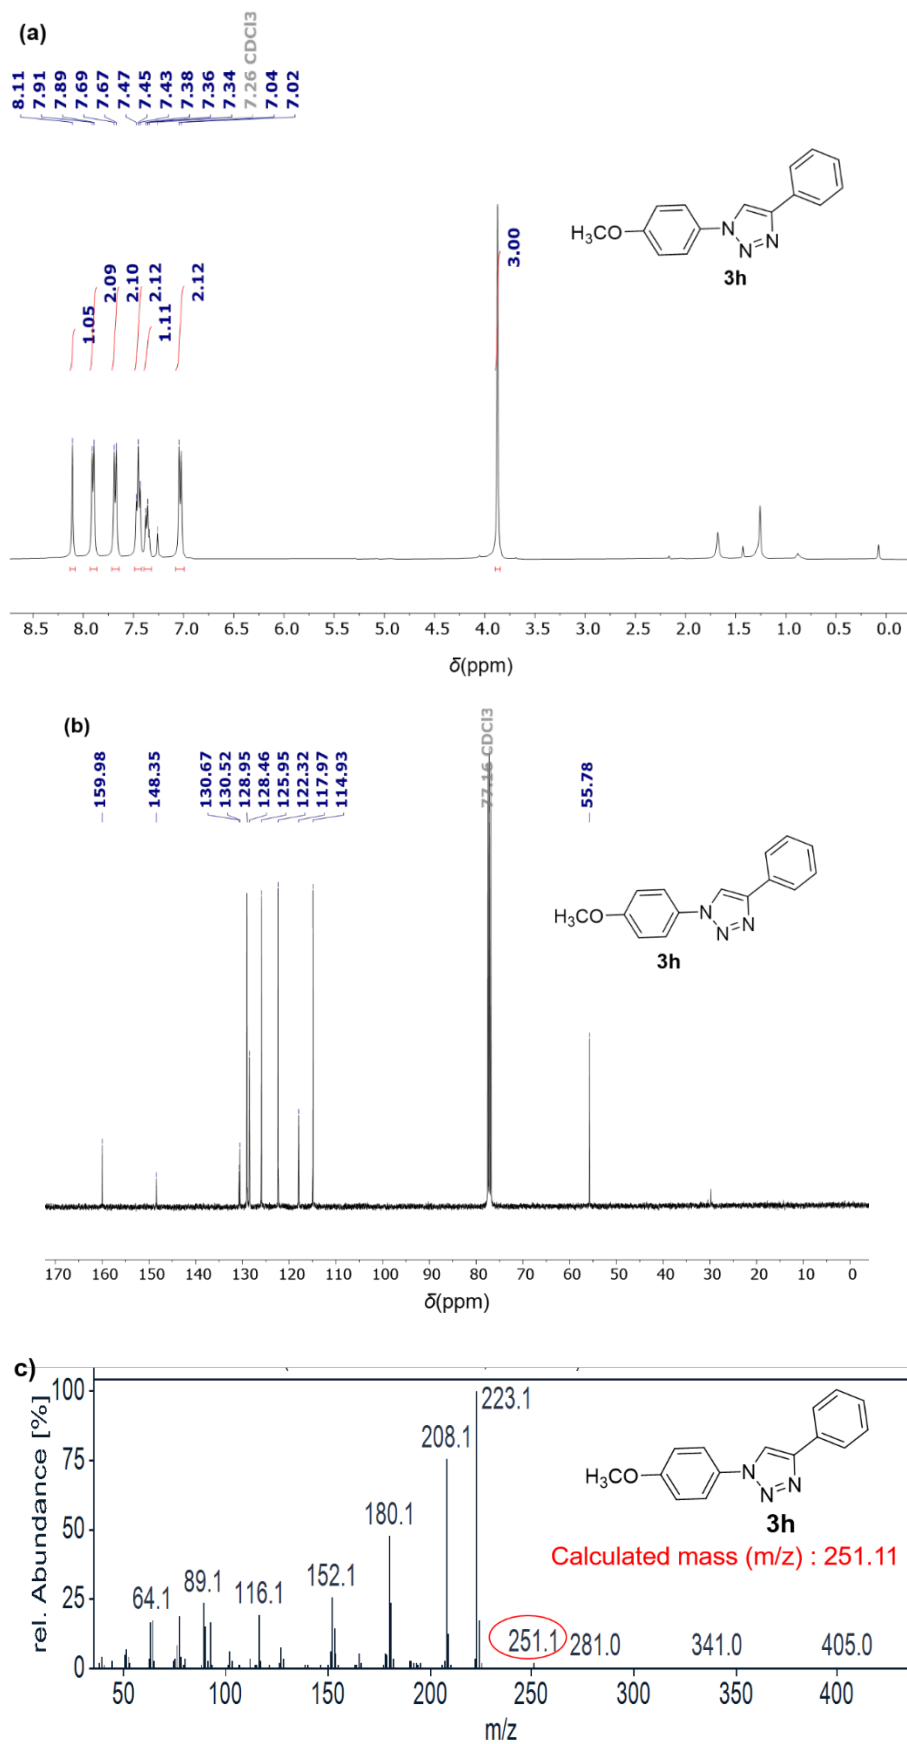

**Fig. S18** (a) <sup>1</sup>H-NMR (400 MHz, CDCl<sub>3</sub>, 298 K), (b) <sup>13</sup>C-NMR (100 MHz, CDCl<sub>3</sub>, 298 K, (c) GC-MS spectra of **3h**.

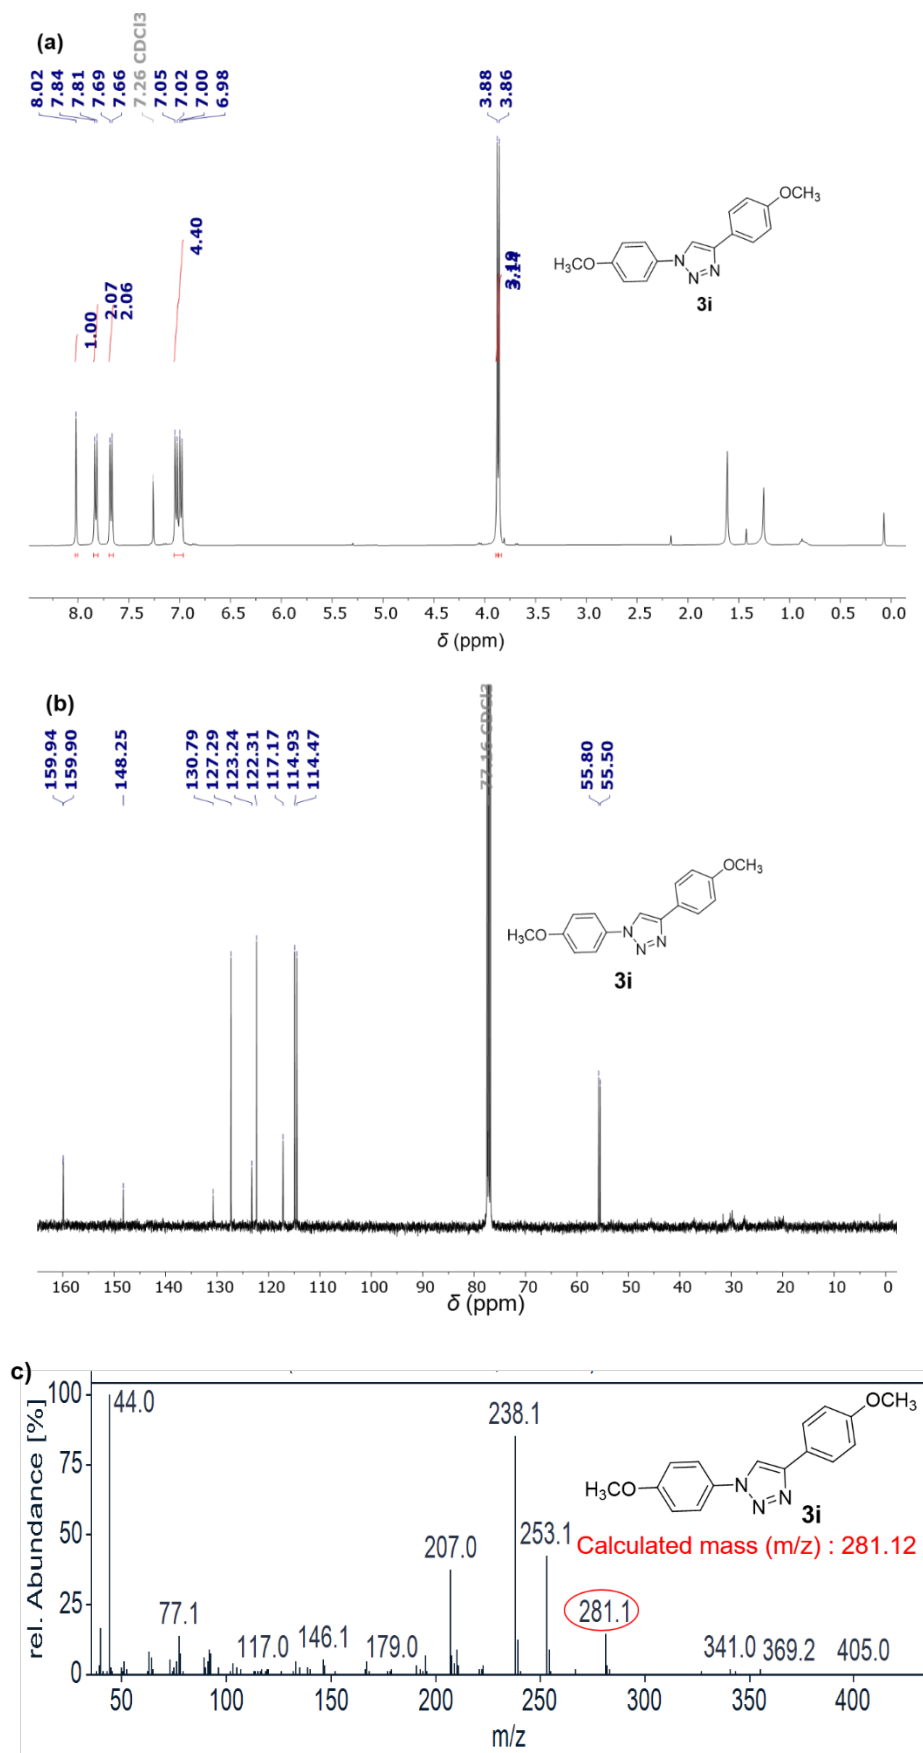

**Fig. S19** (a) <sup>1</sup>H-NMR (400 MHz, CDCl<sub>3</sub>, 298 K), (b) <sup>13</sup>C-NMR (100 MHz, CDCl<sub>3</sub>, 298 K), (c) GC-MS spectra of **3i**.



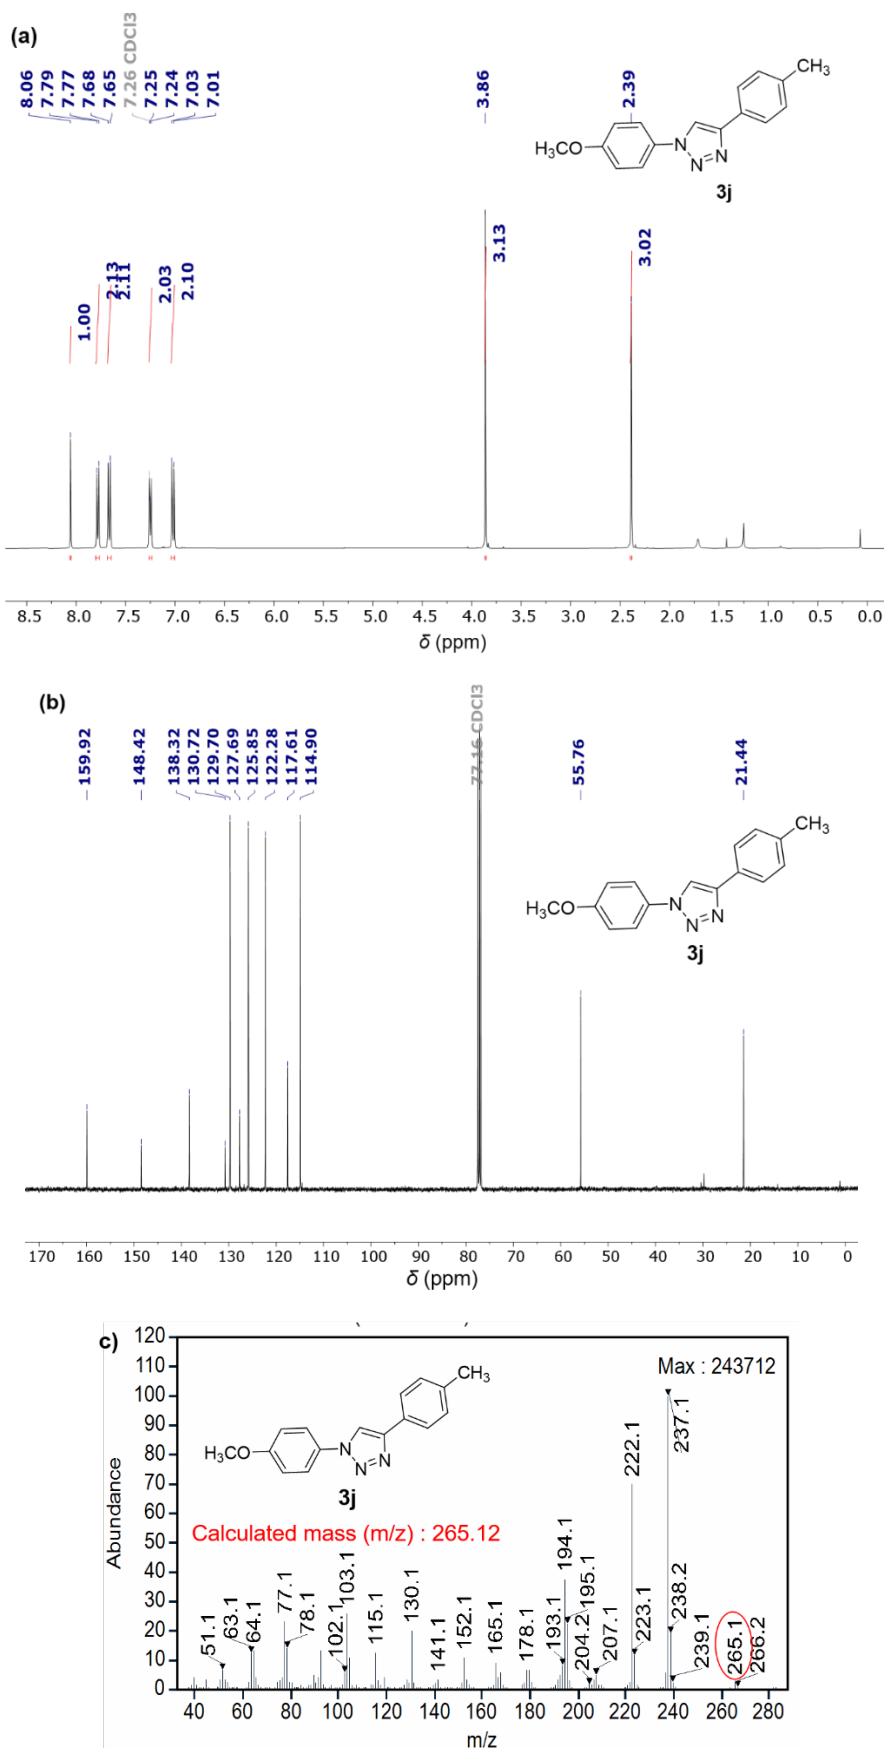

**Fig. S20** (a) <sup>1</sup>H-NMR (400 MHz, CDCl<sub>3</sub>, 298 K), (b) <sup>13</sup>C-NMR (100 MHz, CDCl<sub>3</sub>, 298 K), (c) GC-MS spectra of **3j**.

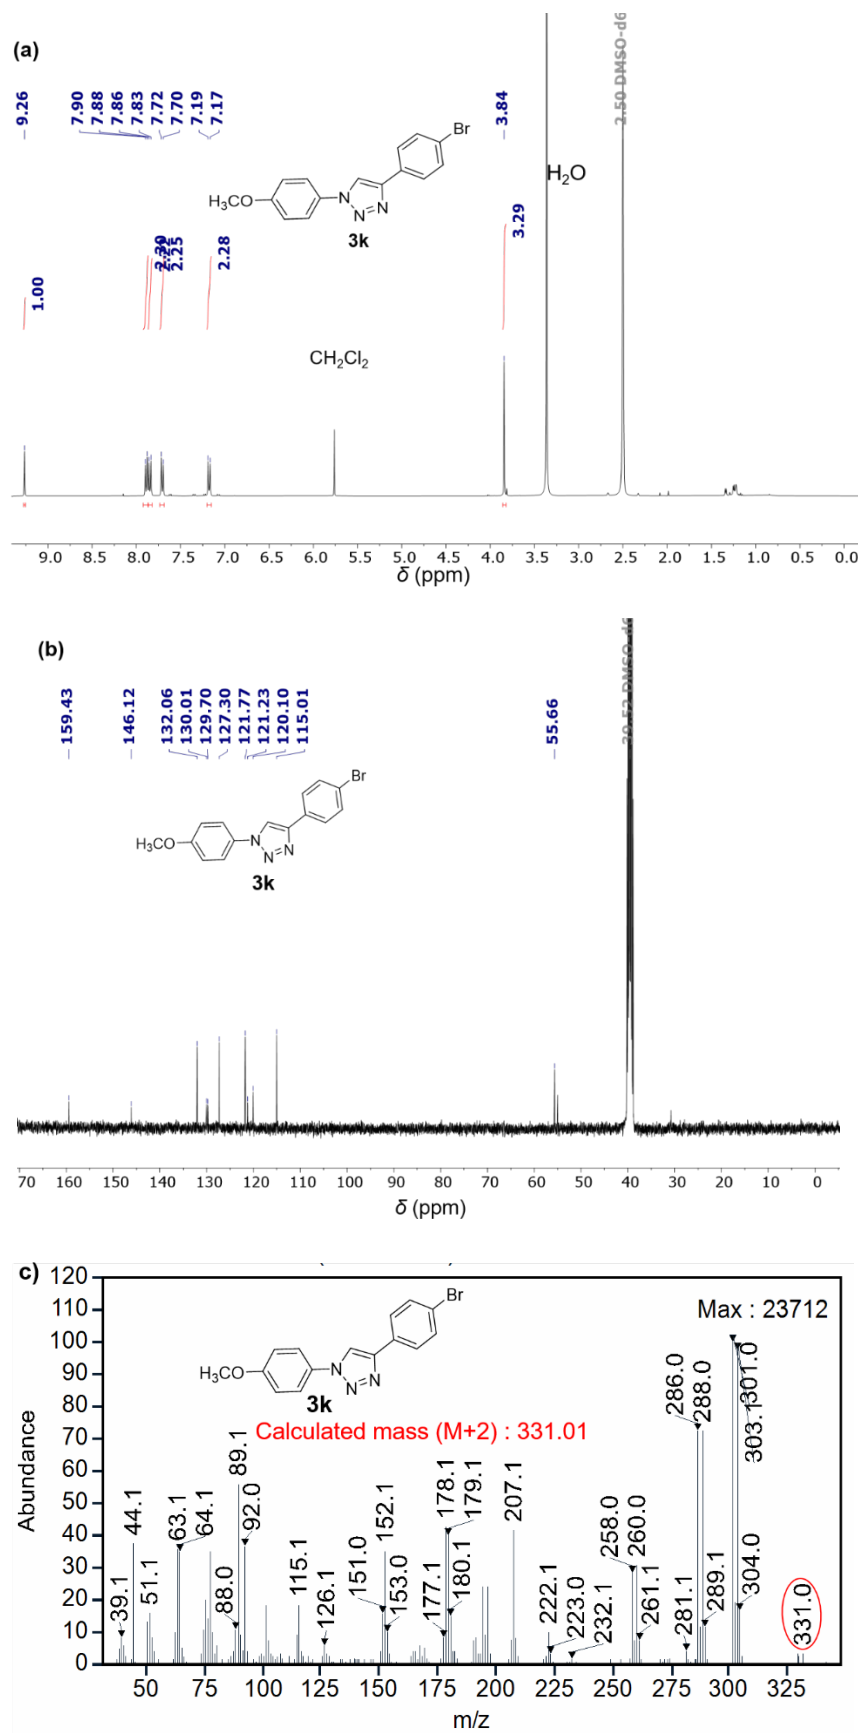

**Fig. S21** (a) <sup>1</sup>H-NMR (400 MHz, DMSO-*d*<sub>6</sub>, 298 K), (b) <sup>13</sup>C-NMR (100 MHz, DMSO-*d*<sub>6</sub>, 298 K), (c) GC-MS spectra of **3k**.

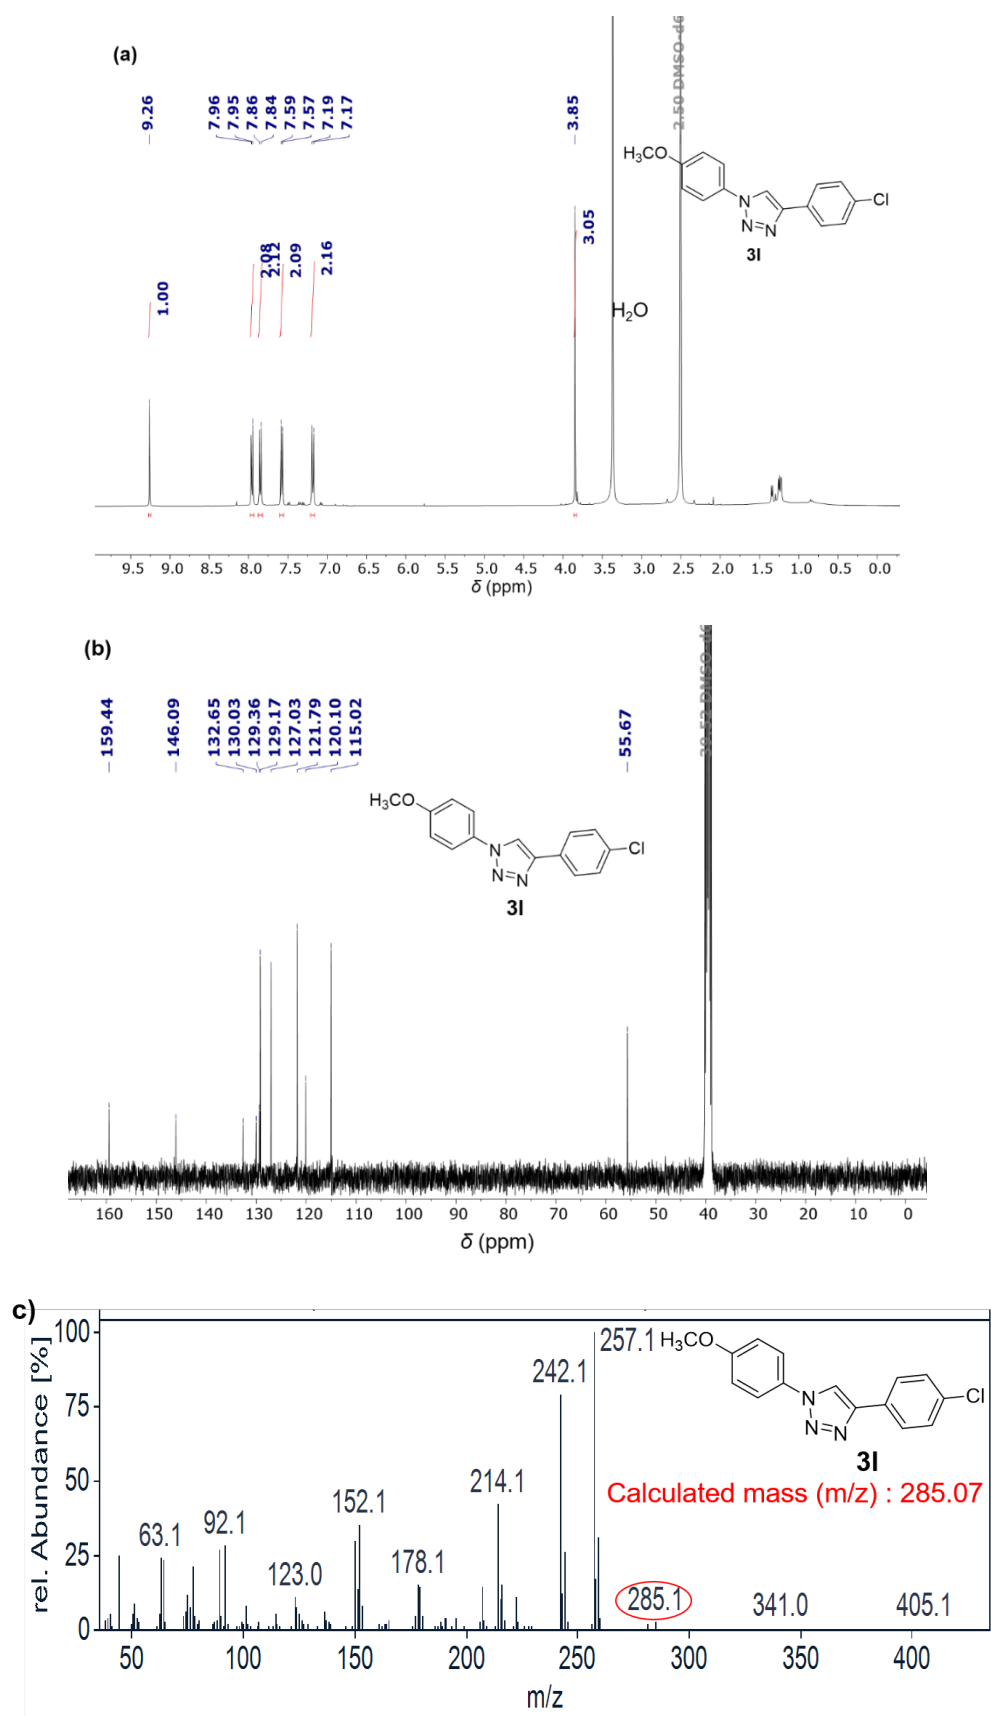

**Fig. S22** (a) <sup>1</sup>H-NMR (400 MHz, DMSO-*d*<sub>6</sub>, 298 K), (b) <sup>13</sup>C-NMR (100 MHz, DMSO-*d*<sub>6</sub>, 298 K), (c) GC-MS spectra of **31**.

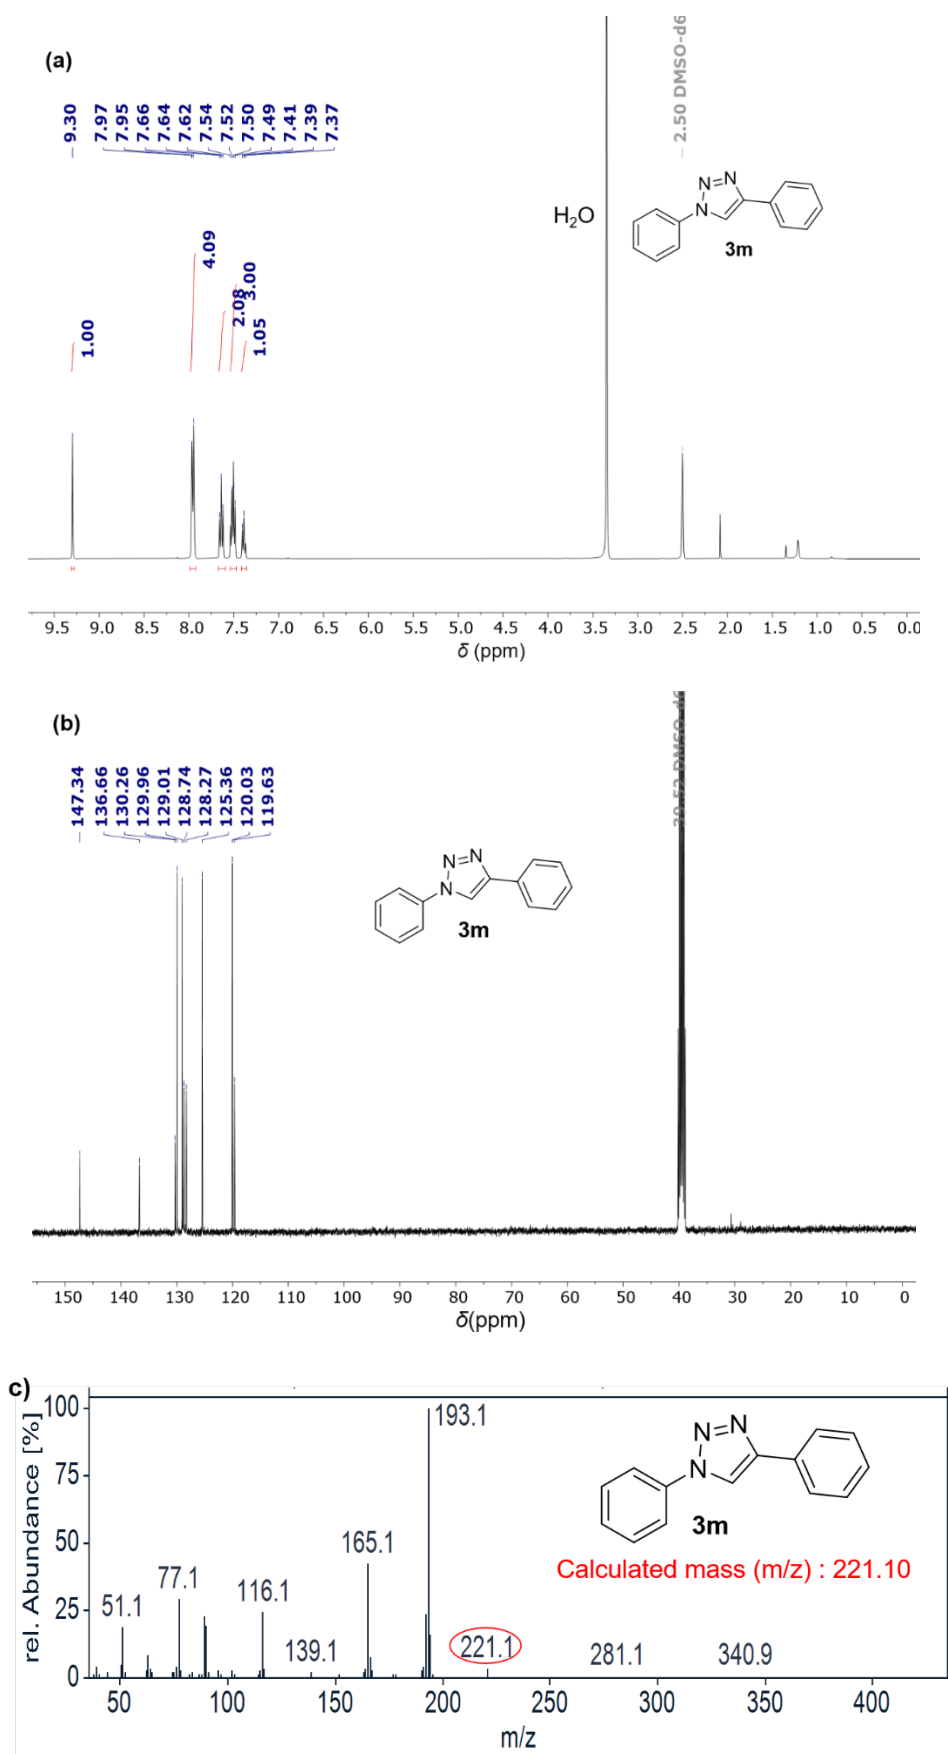

**Fig. S23** (a) <sup>1</sup>H-NMR (400 MHz, DMSO-*d*<sub>6</sub>, 298 K), (b) <sup>13</sup>C-NMR (100 MHz, DMSO-*d*<sub>6</sub>, 298 K), (c) GC-MS spectra of **3m**.

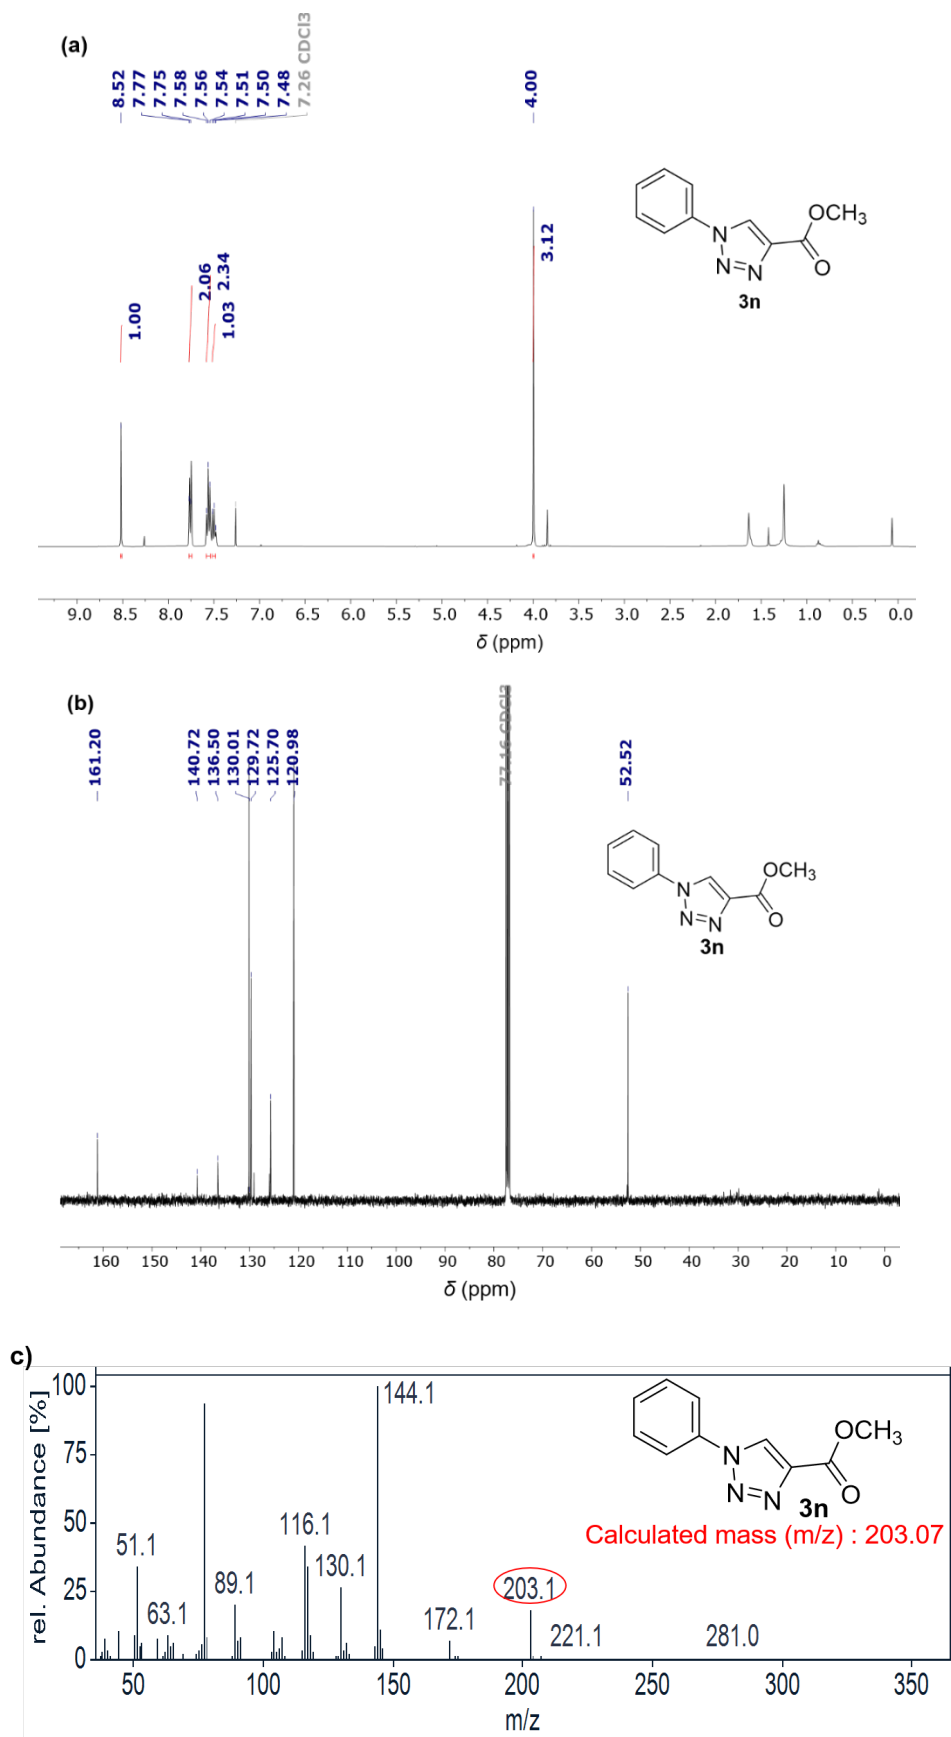

**Fig. S24** (a) <sup>1</sup>H-NMR (400 MHz, CDCl<sub>3</sub>, 298 K), (b) <sup>13</sup>C-NMR (100 MHz, CDCl<sub>3</sub>, 298 K), (c) GC-MS spectra of **3n**.

## Section E: References

- S1 R. C. Mundargi, M. G. Potroz, J. H. Park, J. Seo, E. L. Tan, J. H. Lee and N. J. Cho, *Sci. Rep.*, 2016, **6**, 19960.
- S2 A. Selim, K. M. Neethu, V. Gowri, S. Sartaliya, S. Kaur and G. Jayamurugan, *Asian J. Org. Chem.*, 2021, **10**, 3428–3433.
- S3 K. D. Siebertz and C. P. Hackenberger, *Chem. Comm.*, 2018, **54**, 763–766.
- S4 A. Xie, X. Xu, J. Li, B. Wang and W. Dong, *Asian J. Org. Chem.*, 2014, **3**, 1278–1283.
- S5 S. Rohilla, S. S. Patel and N. Jain, *Eur. J. Org. Chem.*, 2016, **4**, 847–854.
- S6 B. Mohan, H. Kang and K. H. Park, *Inorg. Chem. Commun.*, 2013, **35**, 239–241.
- S7 Y. Chen, Z. J. Zhuo, D. M. Cui and C. Zhang, *J. Organomet. Chem.*, 2014, **749**, 215–218.
- S8 L. Luciani, E. Goff, D. Lanari, S. Santoro and L. Vaccaro, *Green Chem.*, 2018, **20**, 183–187.
- S9 G. Chakraborti, R. Jana, T. Mandal, A. Datta and J. Dash, *Org. Chem. Front.*, 2021, **8**, 2434–2441.
- S10 D. Drelinkiewicz and R. J. Whitby, *RSC Adv.*, 2022, **12**, 28910–28915.
- S11 S. Borukhova, A. D. Seeger, T. Noël, Q. Wang, M. Busch and V. Hessel, *ChemSusChem*, 2015, **8**, 504–512.
